# Supplementary material for: Efficient one-pot synthesis and dehydrogenation of tricyclic dihydropyrimidines catalyzed by OMS-2-SO3H, and application of the functional-chromophore products as colorimetric chemosensors
Source: Royal Society of Chemistry journal article supplement (doi:10.1039/d1ra01005k), 2021-01-01
Supplement: d1ra01005k1.pdf [file d1ra01005k1.pdf]

## *Supporting Information*

### **Efficient One-Pot synthesis and Dehydrogenation of Tricyclic Dihydropyrimidines Catalyzed by OMS-2-SO<sub>3</sub>H, and Application of the Products as Colorimetric Chemosensors**

**Neda Mardazad,<sup>a</sup> Alireza Khorshidi<sup>\*a</sup> and Abdollah Fallah Shojaei<sup>a</sup>**

*Department of Chemistry, Faculty of Sciences, University of Guilan, 41335-1914, Rasht, Iran. Email: khorshidi@guilan.ac.ir, Tel: +989113397159, Fax: 01333367262, ORCID: 0000-0002-8990-8052.*

## **CONTENTS**

|                                                                                     |    |
|-------------------------------------------------------------------------------------|----|
| 1. Fig s1 X-ray diffraction patterns for the OMS-2 and OMS-2-SO <sub>3</sub> H..... | 3  |
| 2. Fig s2 The FT-IR spectrum of OMS-2 and OMS-2-SO <sub>3</sub> H.....              | 4  |
| 3. Fig s3. FTIR spectrum of 5a.....                                                 | 5  |
| 4. Fig s4. <sup>1</sup> H-NMR spectrum of 5a.....                                   | 6  |
| 5. Fig s5. <sup>13</sup> C-NMR spectrum of 5a.....                                  | 7  |
| 6. Fig s6. FTIR spectrum of 5b.....                                                 | 7  |
| 7. Fig s7. <sup>1</sup> H-NMR spectrum of 5b.....                                   | 8  |
| 8. Fig s8. <sup>13</sup> C-NMR spectrum of 5b.....                                  | 9  |
| 9. Fig s9. FTIR spectrum of 5c.....                                                 | 9  |
| 10. Fig s10. <sup>1</sup> H-NMR spectrum of 5c.....                                 | 10 |
| 11. Fig s11. <sup>13</sup> C-NMR spectrum of 5c.....                                | 10 |
| 12. Fig s12. FTIR spectrum of 5d.....                                               | 11 |
| 13. Fig s13. <sup>1</sup> H-NMR spectrum of 5d.....                                 | 11 |
| 14. Fig s14. <sup>13</sup> C-NMR spectrum of 5d.....                                | 12 |
| 15. Fig s15. FTIR spectrum of 6a.....                                               | 12 |
| 16. Fig s16. <sup>1</sup> H-NMR spectrum of 6a.....                                 | 13 |
| 17. Fig s17. <sup>13</sup> C-NMR spectrum of 6a.....                                | 14 |
| 18. Fig s18. FTIR spectrum of 6b.....                                               | 14 |
| 19. Fig s19. <sup>1</sup> H-NMR spectrum of 6b.....                                 | 15 |
| 20. Fig s20. <sup>13</sup> C-NMR spectrum of 6b.....                                | 16 |
| 21. Fig s21. FTIR spectrum of 6c.....                                               | 16 |
| 22. Fig s22. <sup>1</sup> H-NMR spectrum of 6c.....                                 | 17 |
| 23. Fig s23. <sup>13</sup> C-NMR spectrum of 6c.....                                | 17 |
| 24. Fig s24. FTIR spectrum of 6d.....                                               | 18 |

|                                                       |    |
|-------------------------------------------------------|----|
| 25. Fig s25. $^1\text{H}$ -NMR spectrum of 6d.....    | 19 |
| 26. Fig s26. $^{13}\text{C}$ -NMR spectrum of 6d..... | 19 |
| 27. Fig s27. FTIR spectrum of 7a.....                 | 20 |
| 28. Fig s28. $^1\text{H}$ -NMR spectrum of 7a.....    | 21 |
| 29. Fig s29. $^{13}\text{C}$ -NMR spectrum of 7a..... | 22 |
| 30. Fig s30. FTIR spectrum of 7b.....                 | 22 |
| 31. Fig s31. $^1\text{H}$ -NMR spectrum of 7b.....    | 23 |
| 32. Fig s32. $^{13}\text{C}$ -NMR spectrum of 7b..... | 24 |
| 33. Fig s33. FTIR spectrum of 7c.....                 | 24 |
| 34. Fig s34. $^1\text{H}$ -NMR spectrum of 7c.....    | 25 |
| 35. Fig s35. $^{13}\text{C}$ -NMR spectrum of 7c..... | 26 |
| 36. Fig s36. FTIR spectrum of 7d.....                 | 26 |
| 37. Fig s37. $^1\text{H}$ -NMR spectrum of 7d.....    | 27 |
| 38. Fig s38. $^{13}\text{C}$ -NMR spectrum of 7d..... | 27 |
| 39. Fig s39. FTIR spectrum of 8a.....                 | 28 |
| 40. Fig s40. $^1\text{H}$ -NMR spectrum of 8a.....    | 29 |
| 41. Fig s41. $^{13}\text{C}$ -NMR spectrum of 8a..... | 30 |
| 42. Fig s42. FTIR spectrum of 8b.....                 | 30 |
| 43. Fig s43. $^1\text{H}$ -NMR spectrum of 8b.....    | 31 |
| 44. Fig s44. $^{13}\text{C}$ -NMR spectrum of 8b..... | 32 |
| 45. Fig s45. FTIR spectrum of 8c.....                 | 32 |
| 46. Fig s46. $^1\text{H}$ -NMR spectrum of 8c.....    | 33 |
| 47. Fig s47. $^{13}\text{C}$ -NMR spectrum of 8c..... | 34 |
| 48. Fig s48. FTIR spectrum of 8d.....                 | 34 |
| 49. Fig s49. $^1\text{H}$ -NMR spectrum of 8d.....    | 35 |
| 50. Fig s50. $^{13}\text{C}$ -NMR spectrum of 8d..... | 35 |

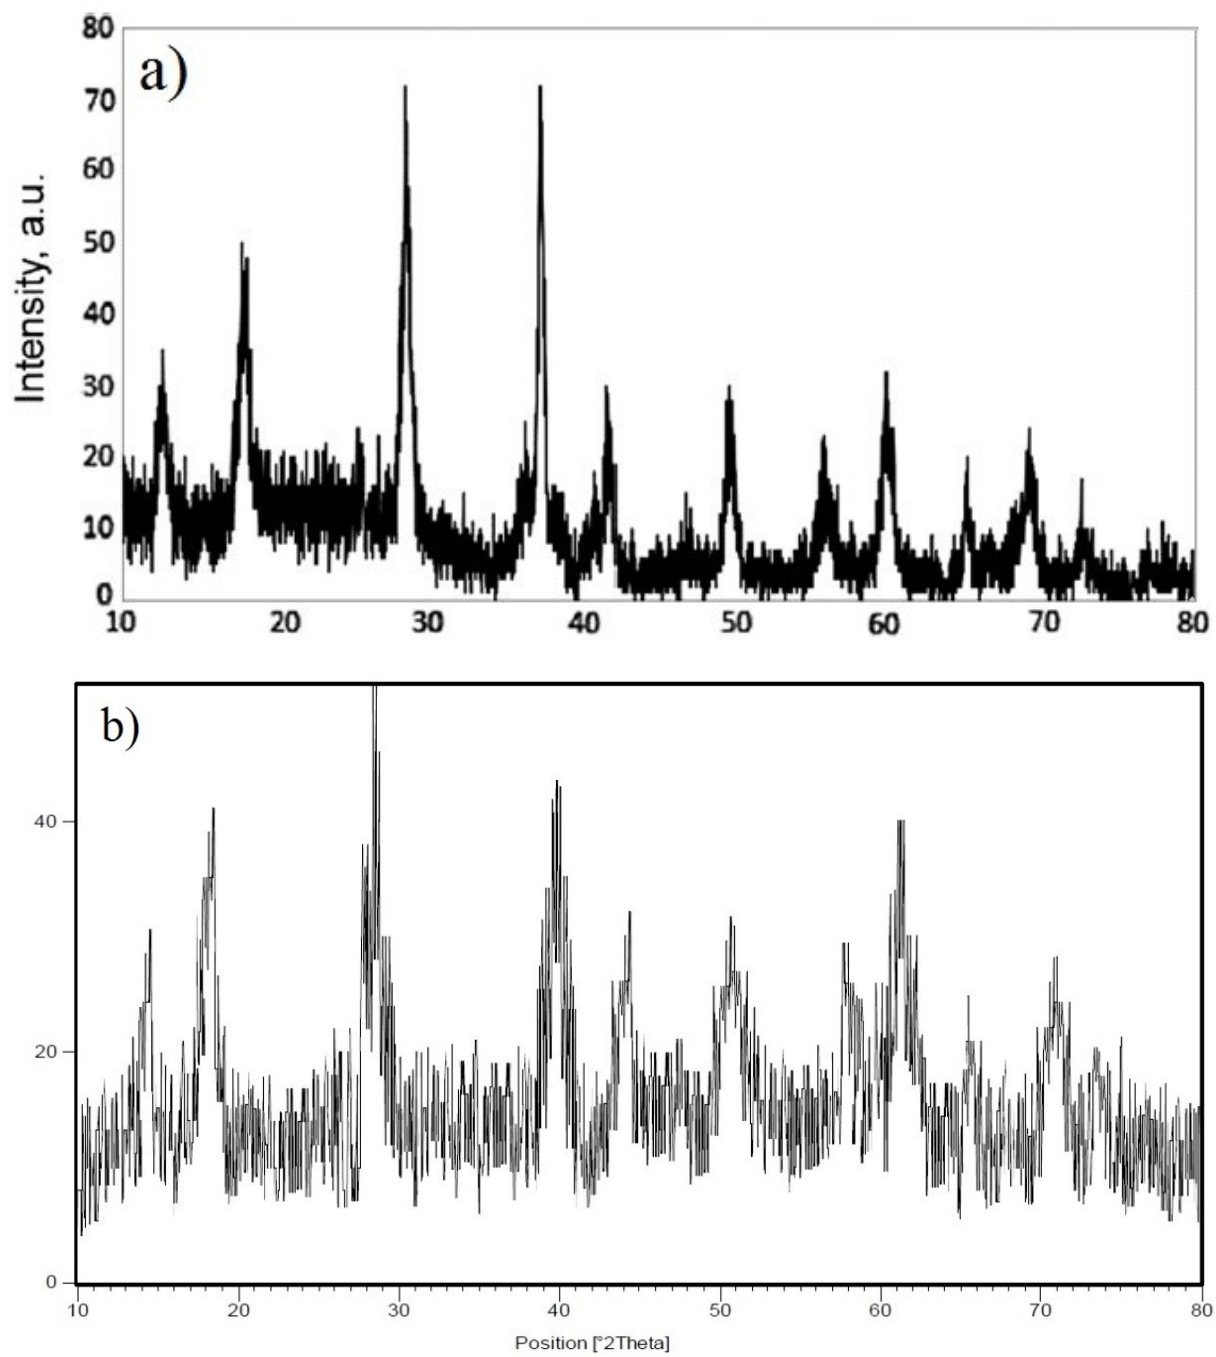

**Fig. s1** X-ray diffraction patterns for the OMS-2 (a) and its sulfonated form (b).

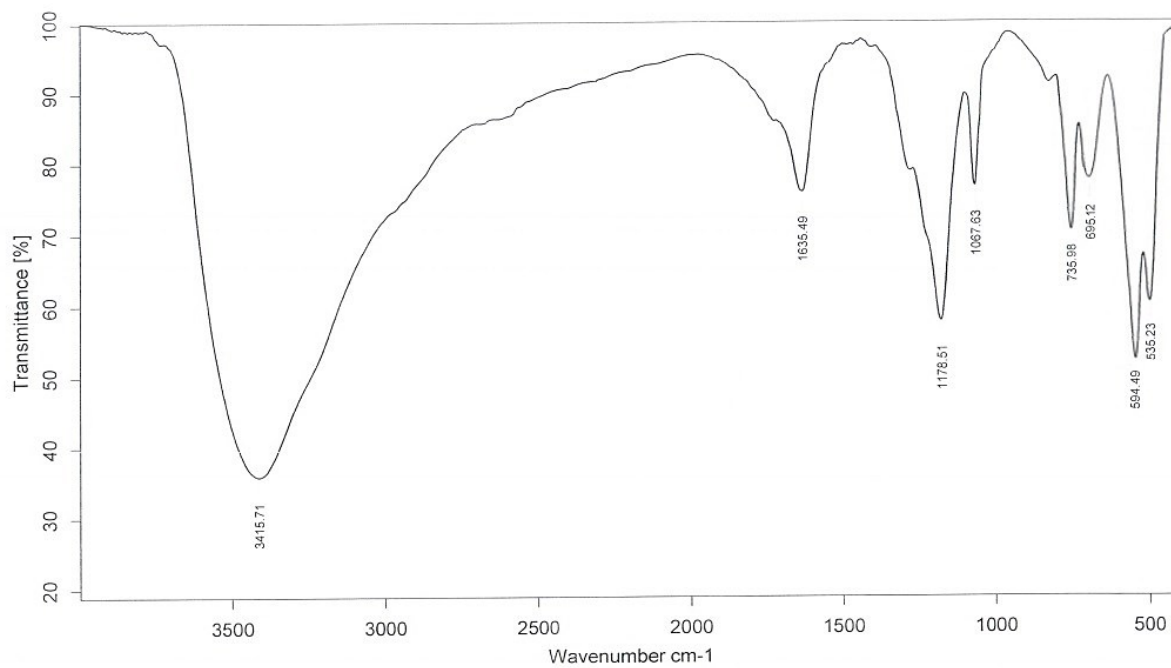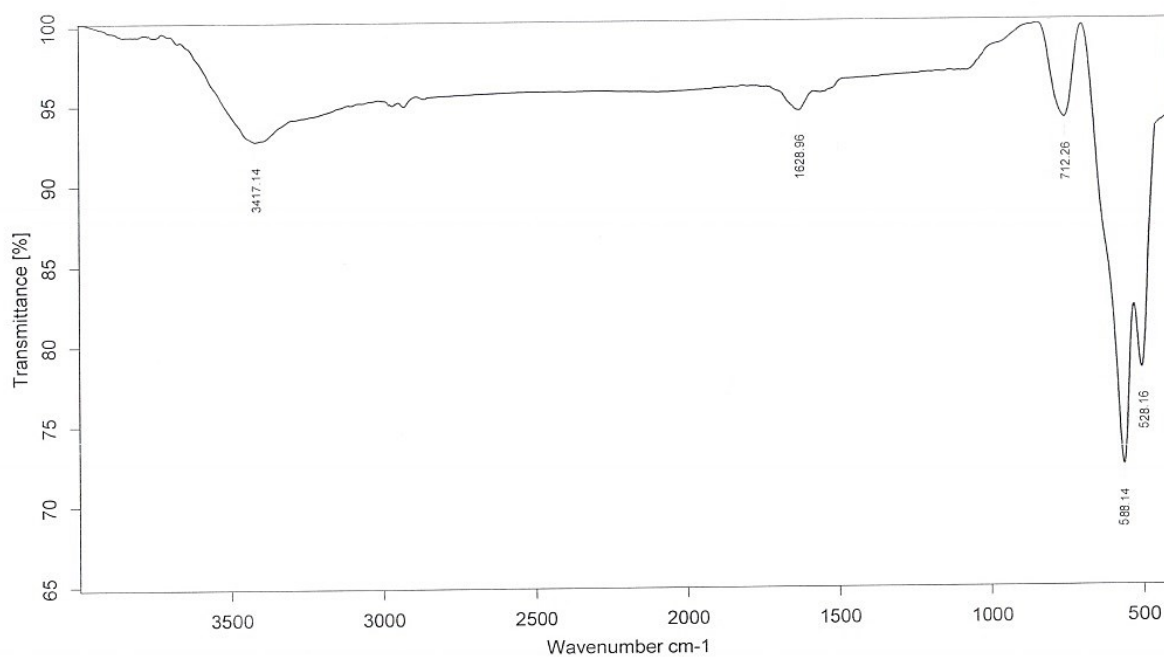

Fig. s2 FT-IR spectra of OMS-2-SO<sub>3</sub>H (top) and OMS-2 (bottom).

## Spectral data of 5a

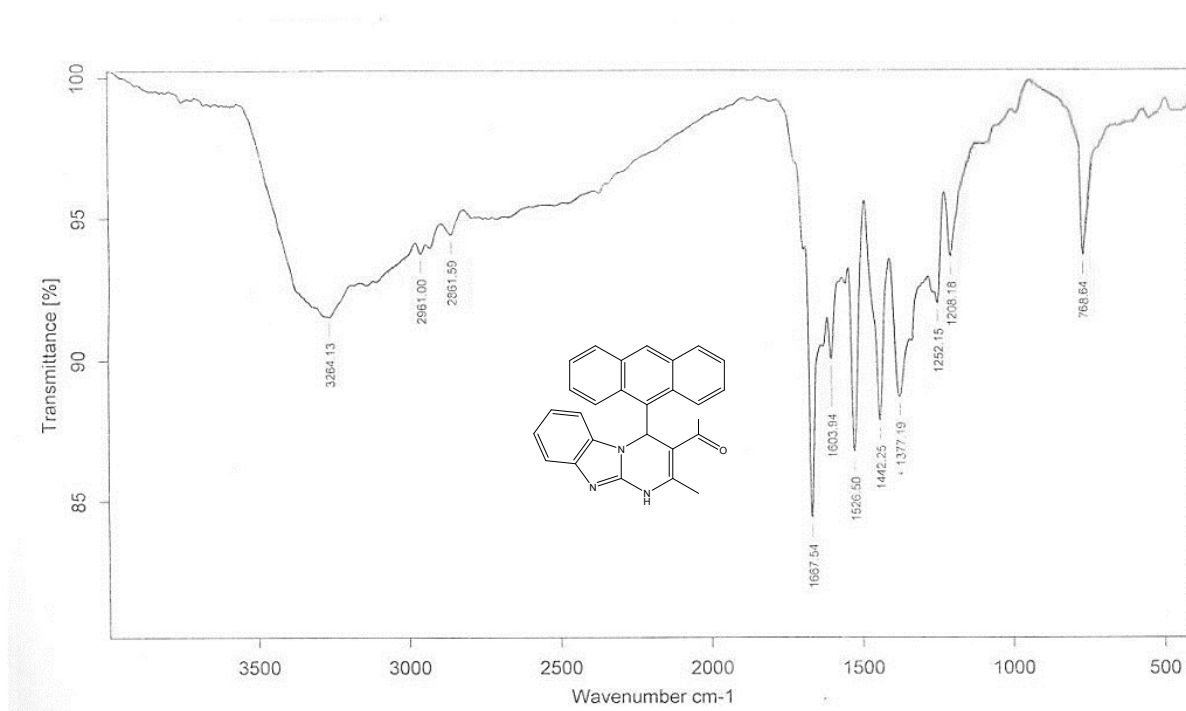

Fig. s3 FTIR spectrum of 5a

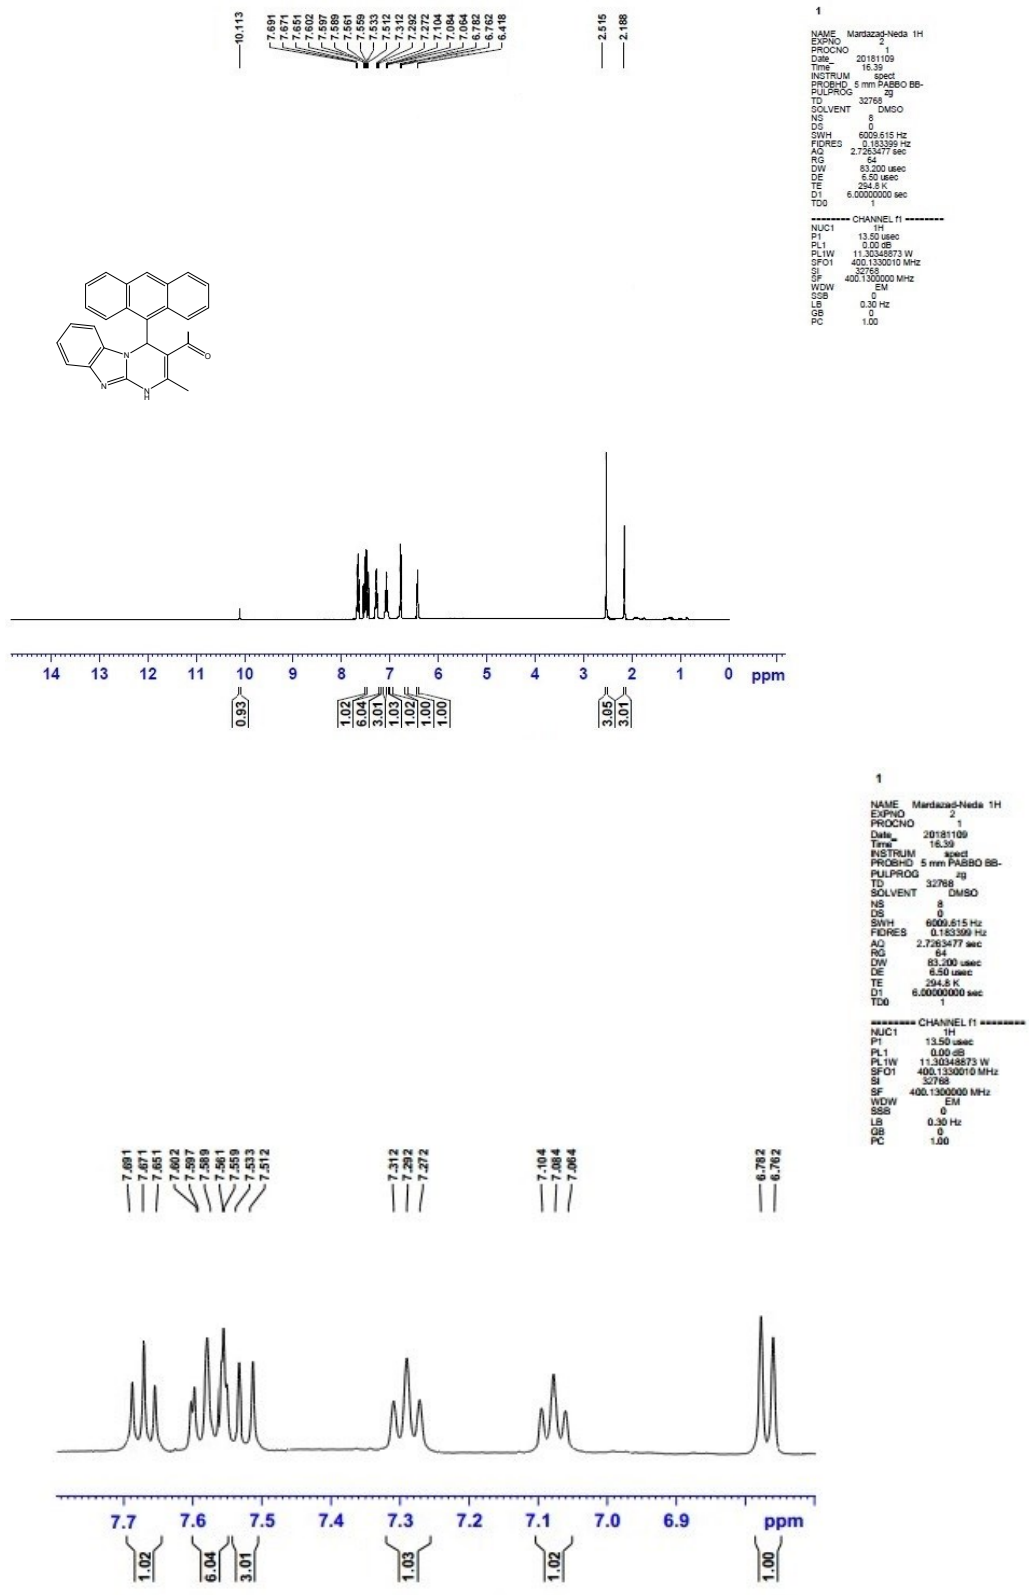

Fig s4 <sup>1</sup>H-NMR spectrum of 5a

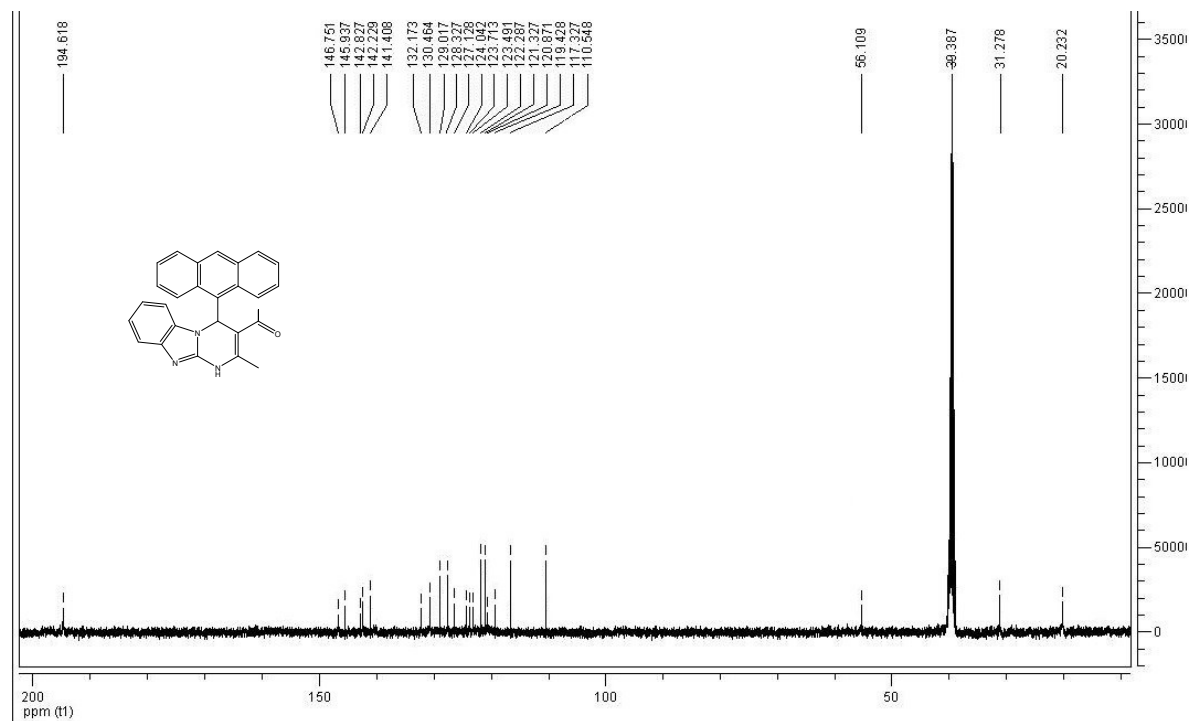

Fig s5 <sup>13</sup>C-NMR spectrum of 5a

### Spectral data of 5b

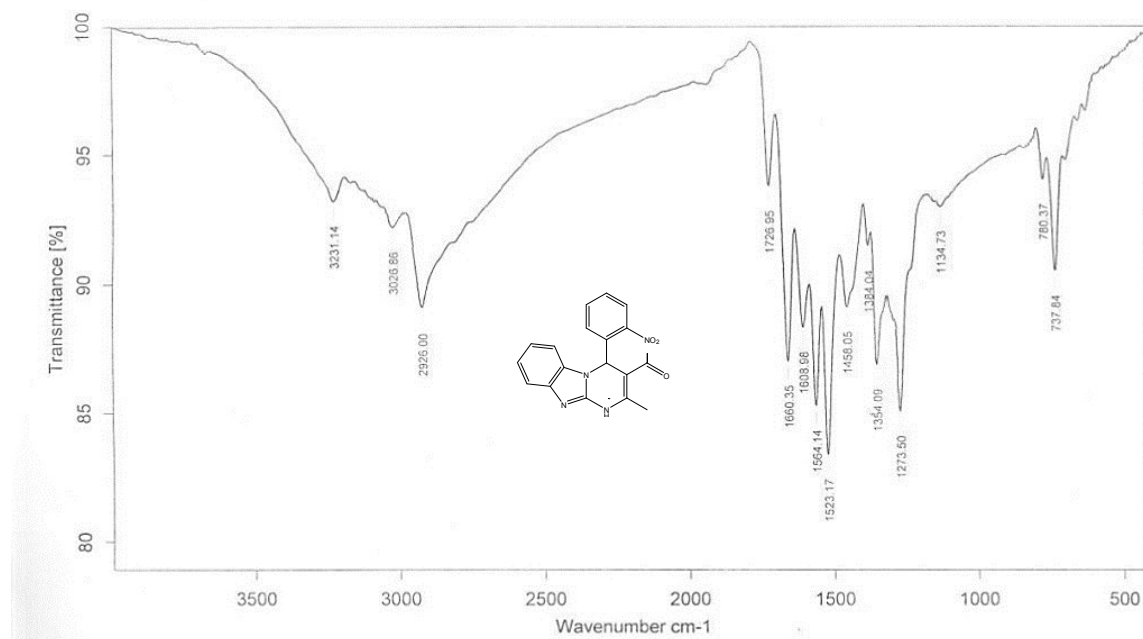

Fig. s6 FTIR spectrum of 5b

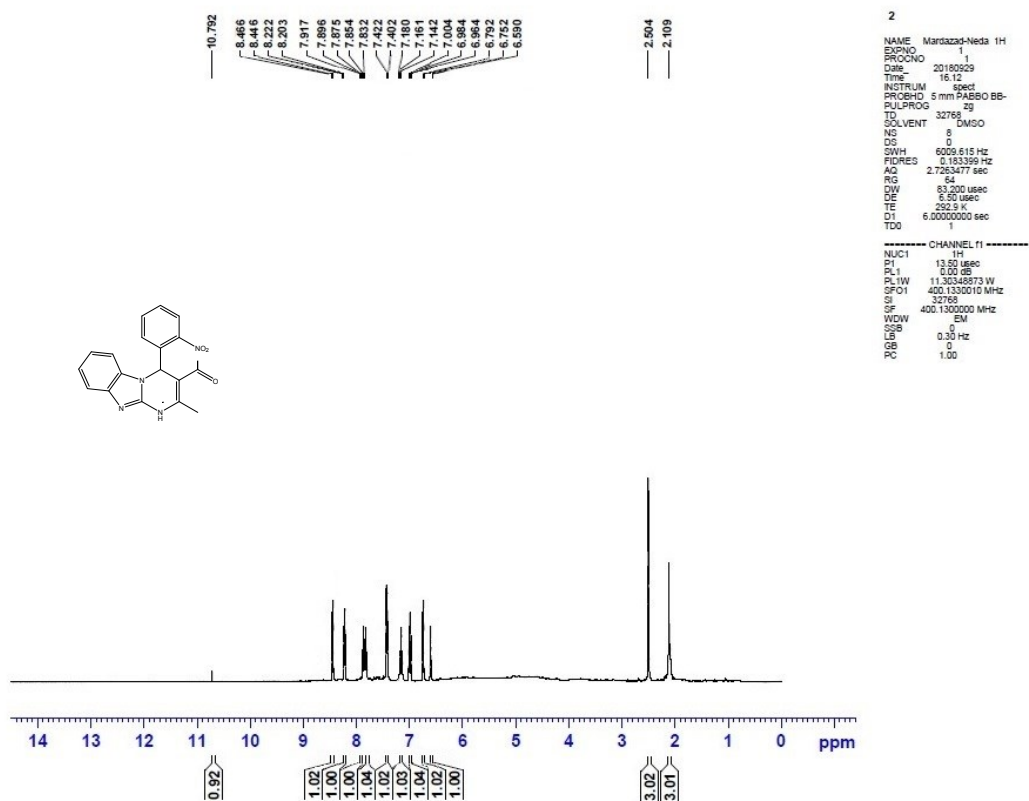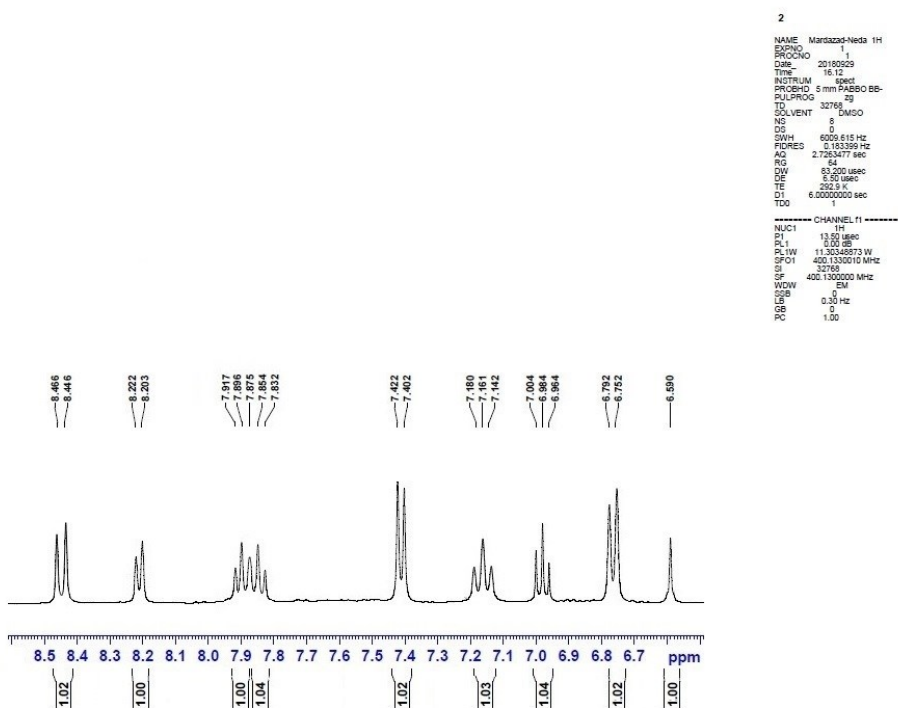

Fig s7 <sup>1</sup>H-NMR spectrum of 5b



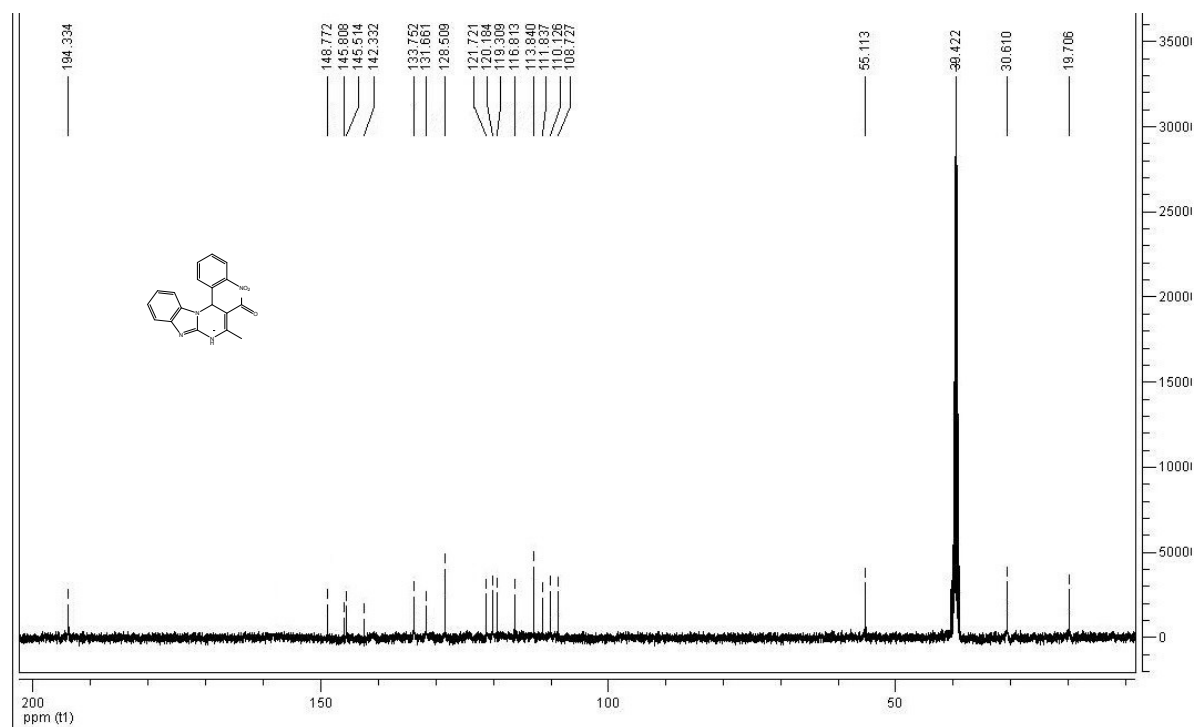

Fig s8 <sup>13</sup>C-NMR spectrum of 5b

### Spectral data of 5c

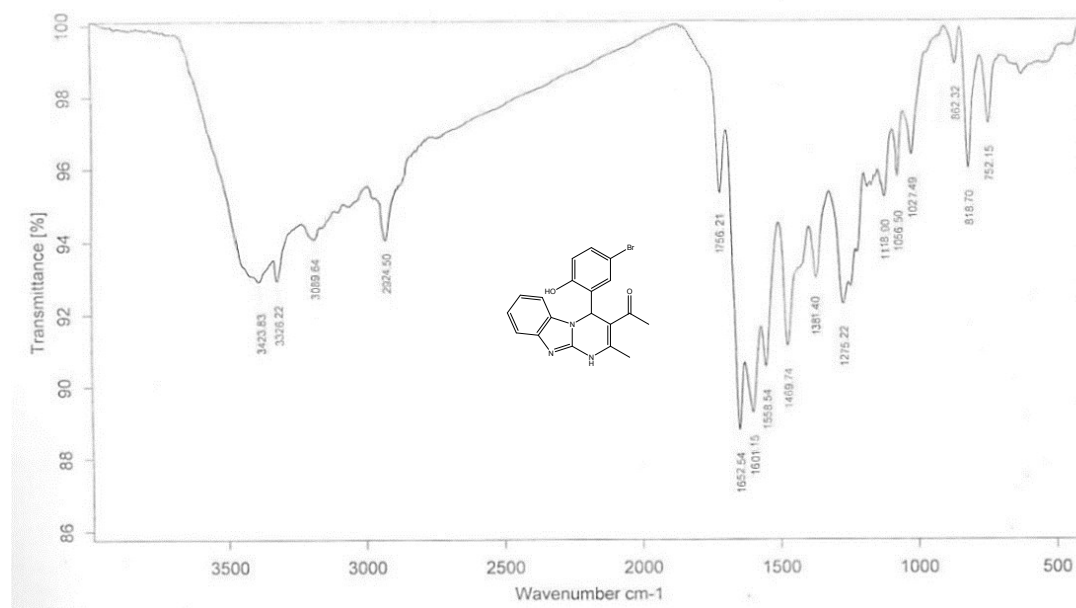

Fig. s9 FTIR spectrum of 5c

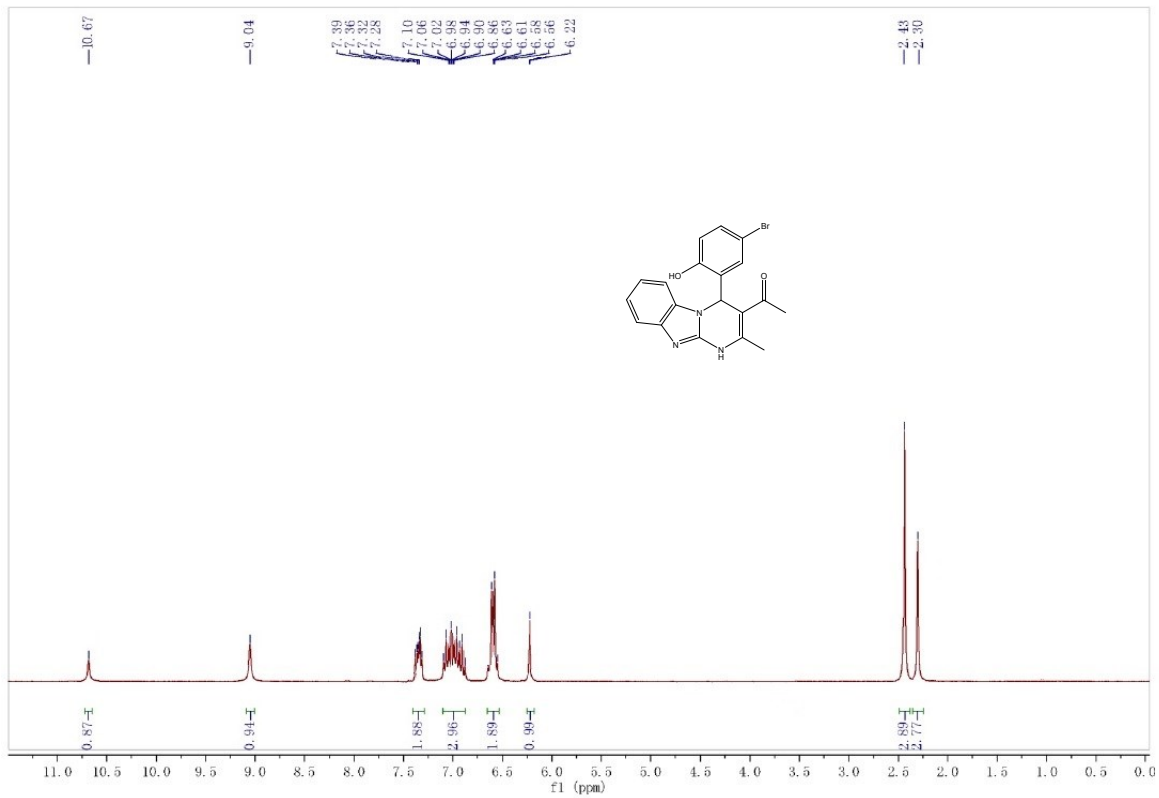

Fig s10 <sup>1</sup>H-NMR spectrum of 5c

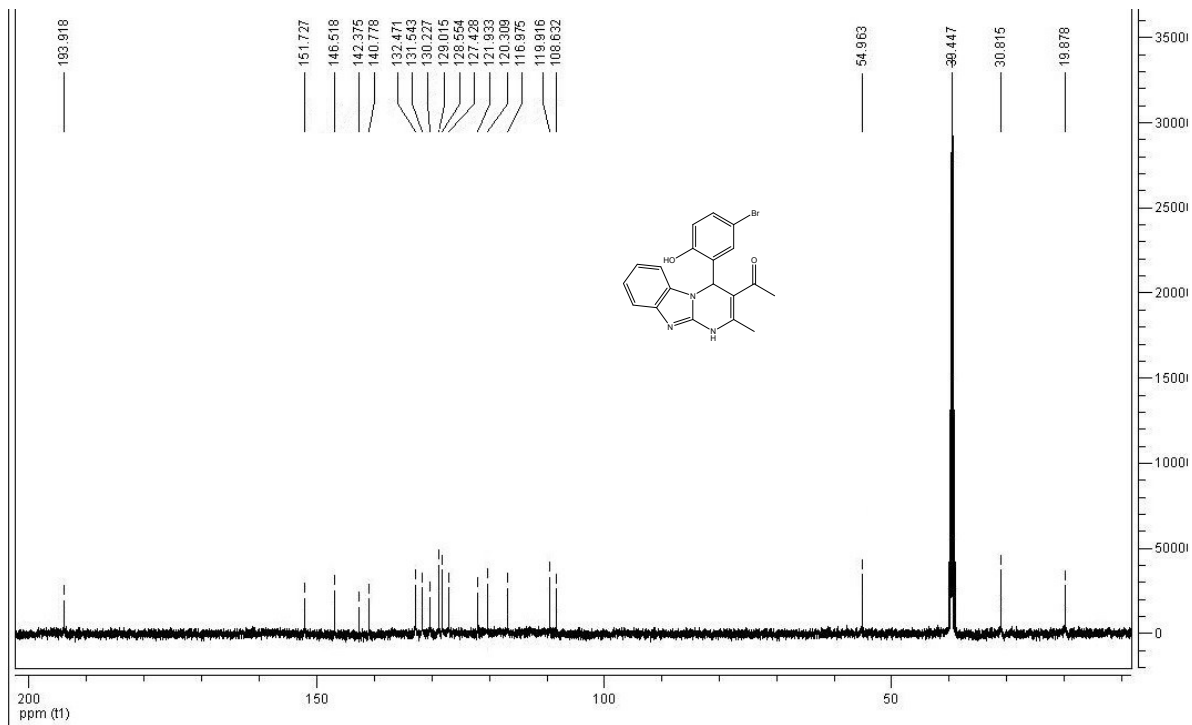

Fig s11 <sup>13</sup>C-NMR spectrum of 5c

## Spectral data of 5d

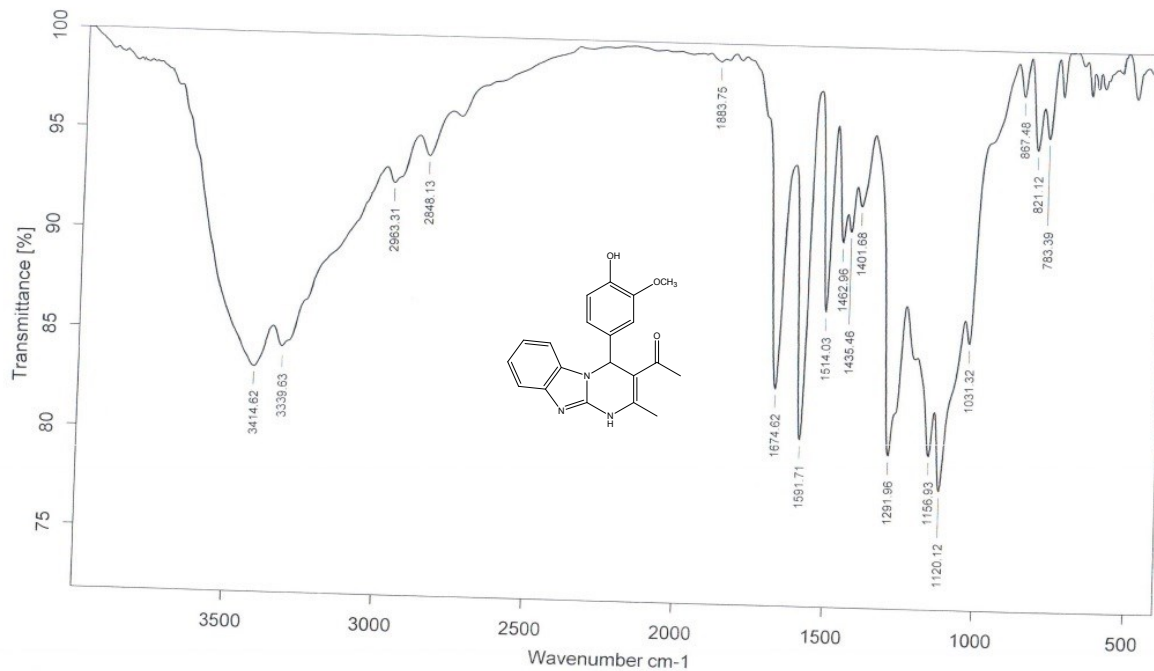

Fig. s12 FTIR spectrum of 5d

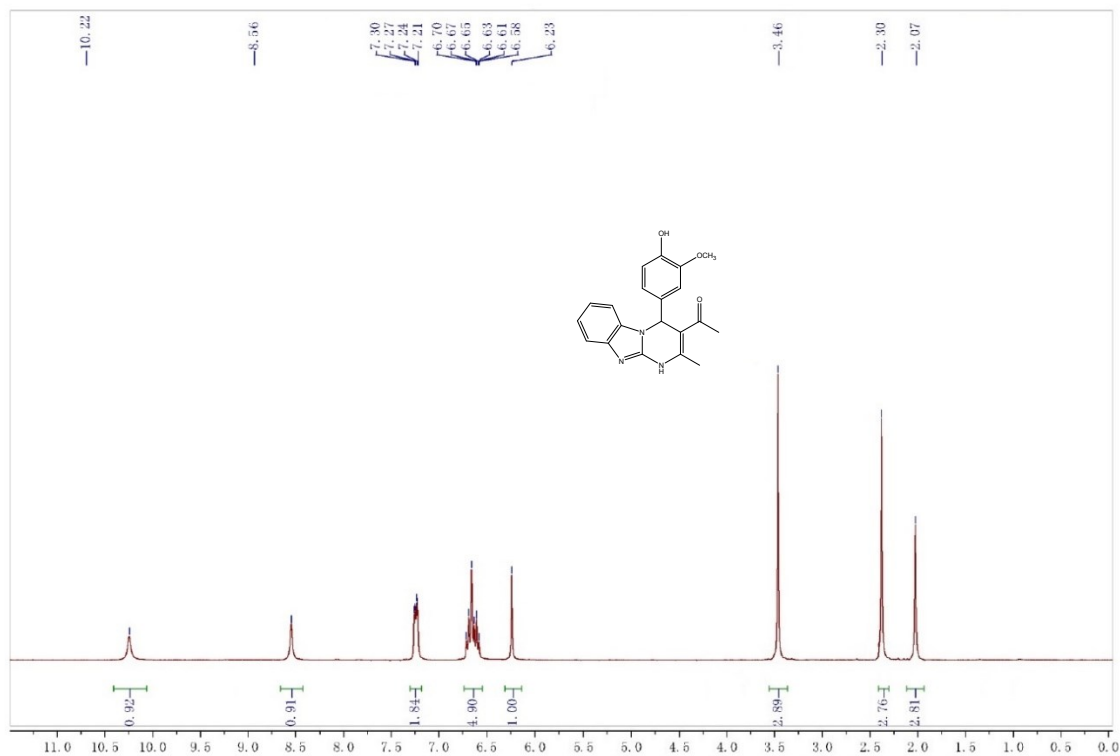

Fig s13 <sup>1</sup>H-NMR spectrum of 5d

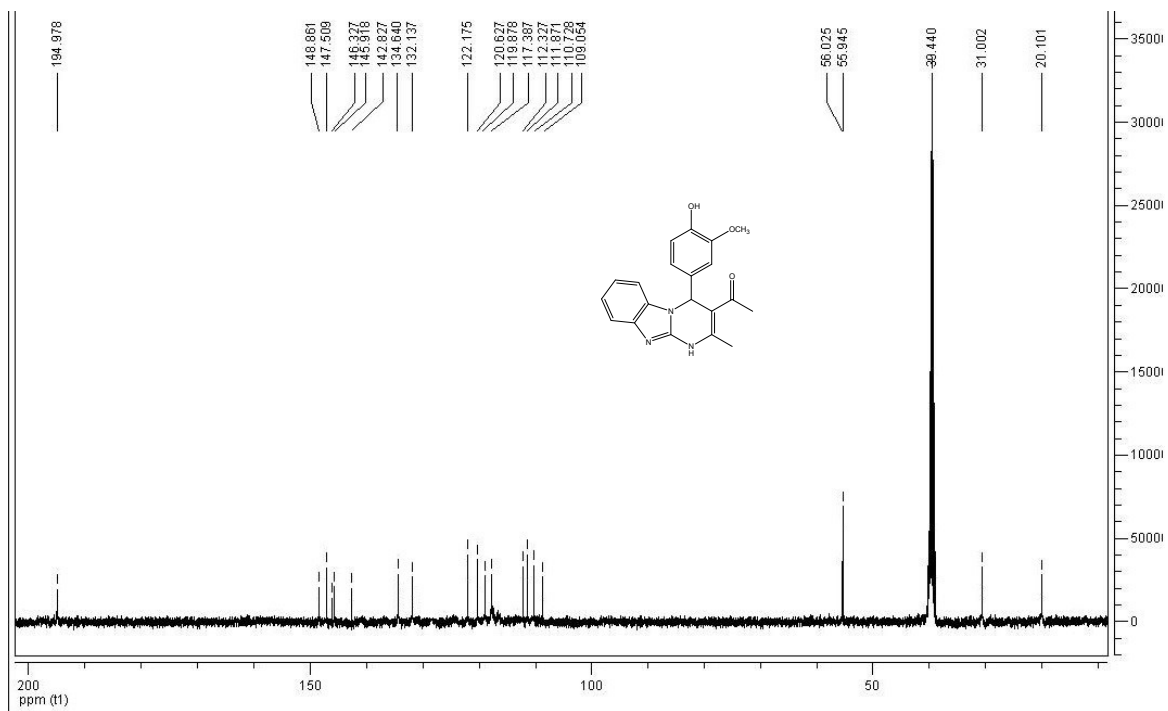

Fig s14  $^{13}\text{C}$ -NMR spectrum of 5d

## Spectral data of 6a

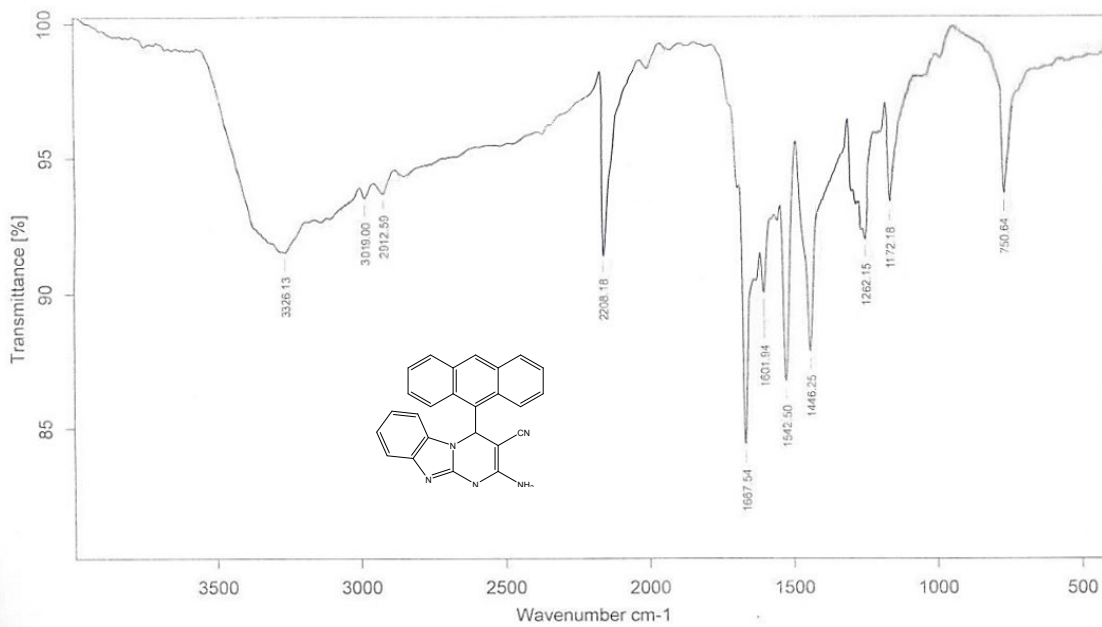

Fig. s15 FTIR spectrum of 6a

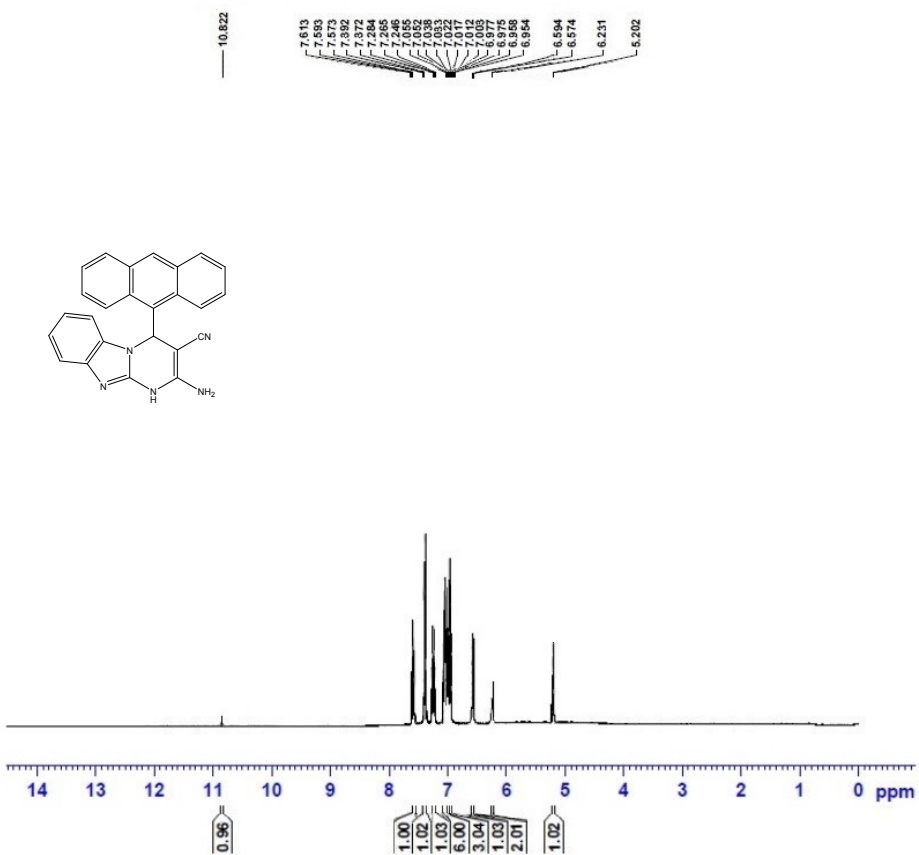

```

3
NAME  Martazad-Neda 1H
EXPNO  4
PROCNO  1
Date_  20181211
Time_  13.39
INSTRUM  spect
PROBHD  5 mm PABBO BB-
PULPROG  zg
TD  32768
SOLVENT  DMSO
NS  8
DS  0
SWH  6009.615 Hz
FIDRES  0.183399 Hz
AQ  2.7283477 sec
RG  64
DW  63.200 usec
DE  6.50 usec
TE  295.9 K
D1  6.0000000 sec
TD0  1

----- CHANNEL f1 -----
NUC1  1H
P1  13.50 usec
PL1  0.00 dB
PL1W  11.30348873 W
SFO1  400.1300010 MHz
SI  32768
SF  400.1300000 MHz
WDW  EM
SSB  0
LB  0.30 Hz
GB  0
PC  1.00

```

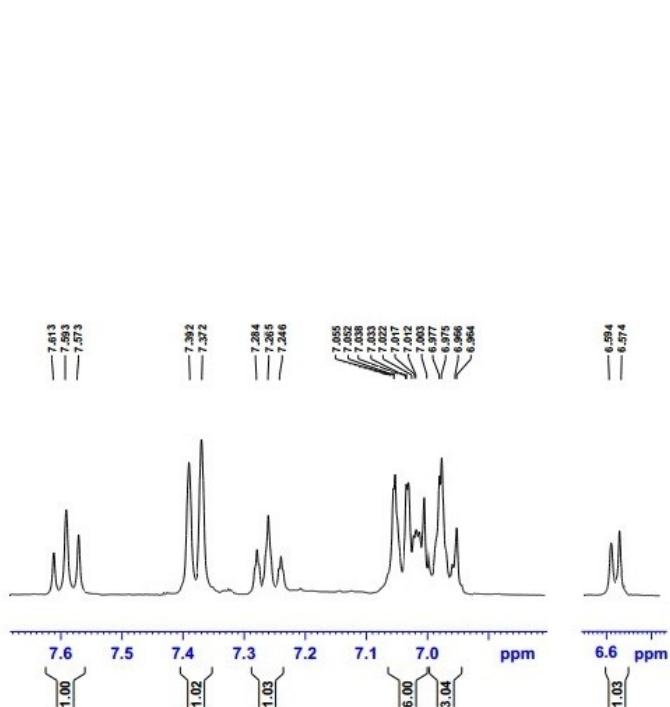

```

NAME  Martazad-Neda 1H
EXPNO  4
PROCNO  1
Date_  20181211
Time_  13.39
INSTRUM  spect
PROBHD  5 mm PABBO BB-
PULPROG  zg
TD  32768
SOLVENT  DMSO
NS  8
DS  0
SWH  6009.615 Hz
FIDRES  0.183399 Hz
AQ  2.7283477 sec
RG  64
DW  63.200 usec
DE  6.50 usec
TE  295.9 K
D1  6.0000000 sec
TD0  1

----- CHANNEL f1 -----
NUC1  1H
P1  13.50 usec
PL1  0.00 dB
PL1W  11.30348873 W
SFO1  400.1300010 MHz
SI  32768
SF  400.1300000 MHz
WDW  EM
SSB  0
LB  0.30 Hz
GB  0
PC  1.00

```

Fig s16 <sup>1</sup>H-NMR spectrum of 6a

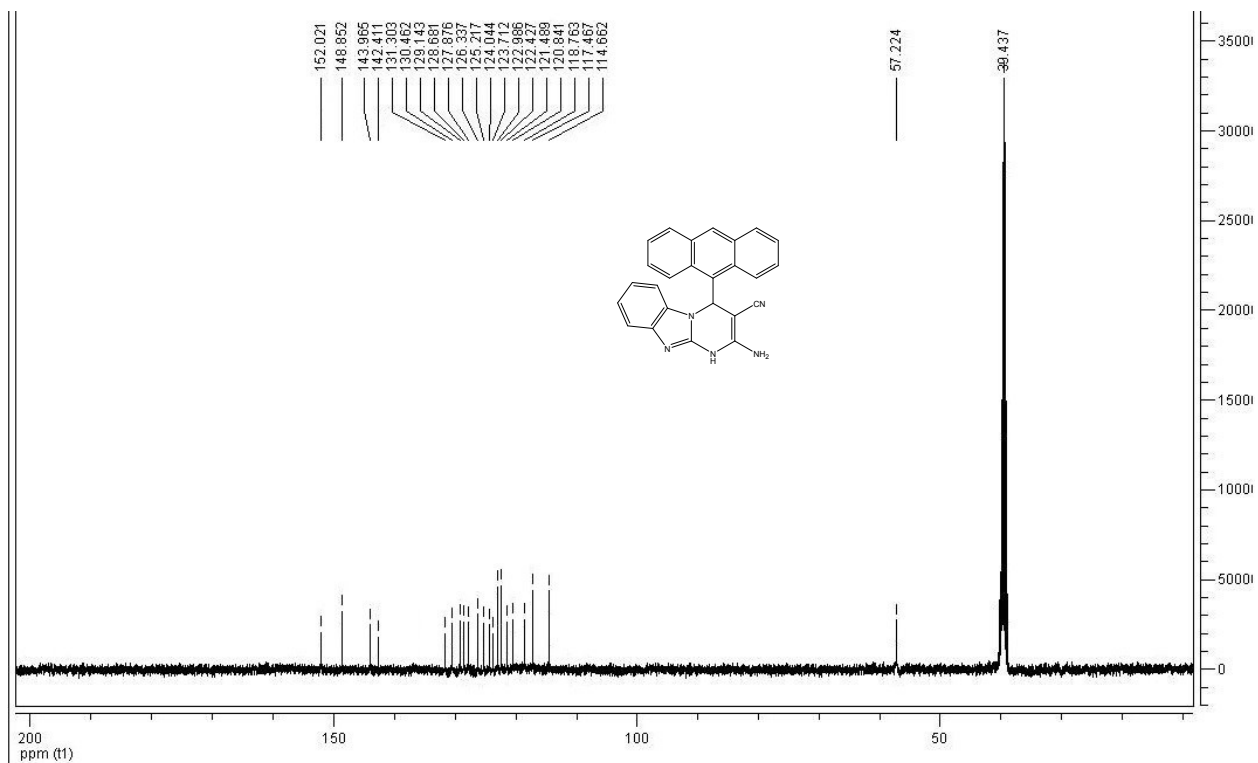

Fig s17  $^{13}\text{C}$ -NMR spectrum of 6a

### Spectral data of 6b

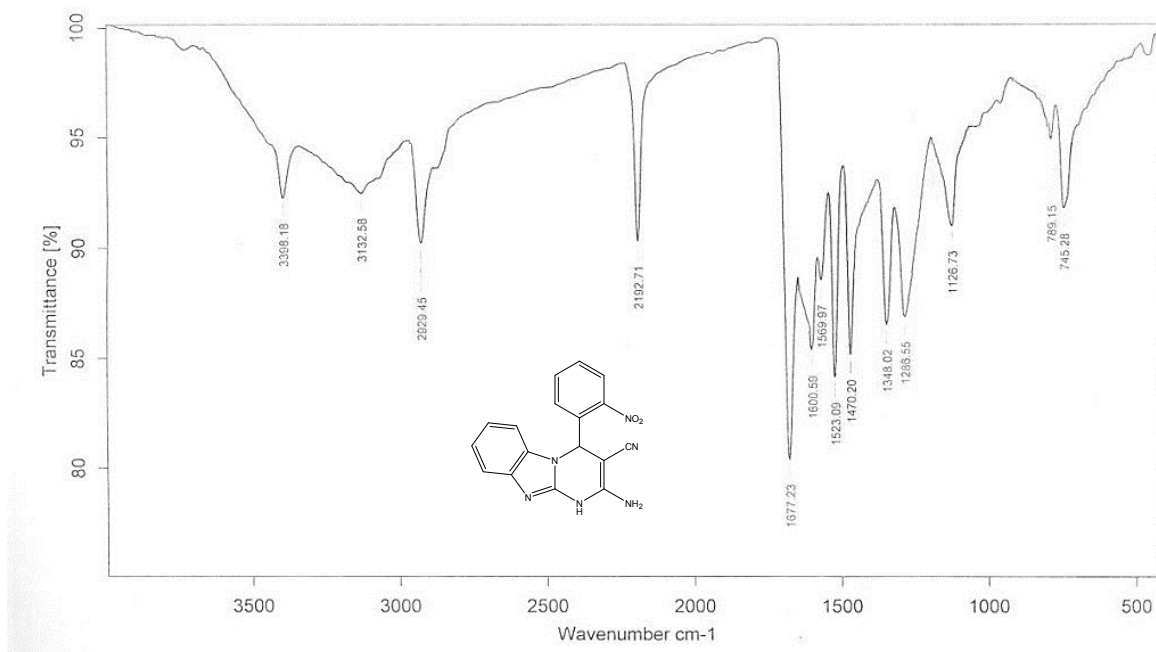

Fig. s18 FTIR spectrum of 6b

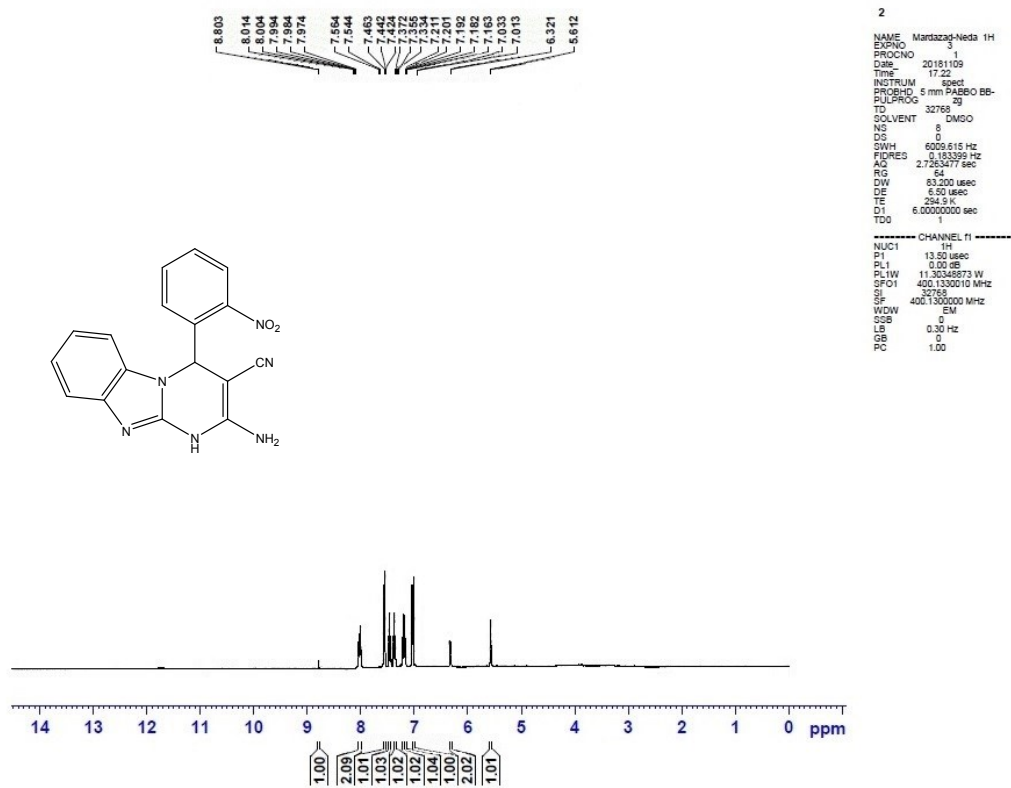

```

2
NAME Maroqaz-Neda 1H
EXPNO 1
PROCNO 1
Date_ 20181109
Time 17.22
INSTRUM spect
PROBHD 5 mm PABBO BB-
PULPROG zgpg30
TD 32768
SOLVENT DMSO
NS 8
DS 0
SWH 6005.615 Hz
FIDRES 0.183399 Hz
AQ 2.7263477 sec
RG 64
DW 63.200 usec
DE 6.50 usec
TE 294.2 K
D1 6.0000000 sec
TDO 1
----- CHANNEL f1 -----
NUC1 1H
P1 13.50 usec
PL1 0.00 dB
PL1W 11.30345873 W
SFO1 400.1300010 MHz
SI 32768
SF 400.1300000 MHz
WDW EM
SSB 0
LB 0.30 Hz
GB 0
PC 1.00

```

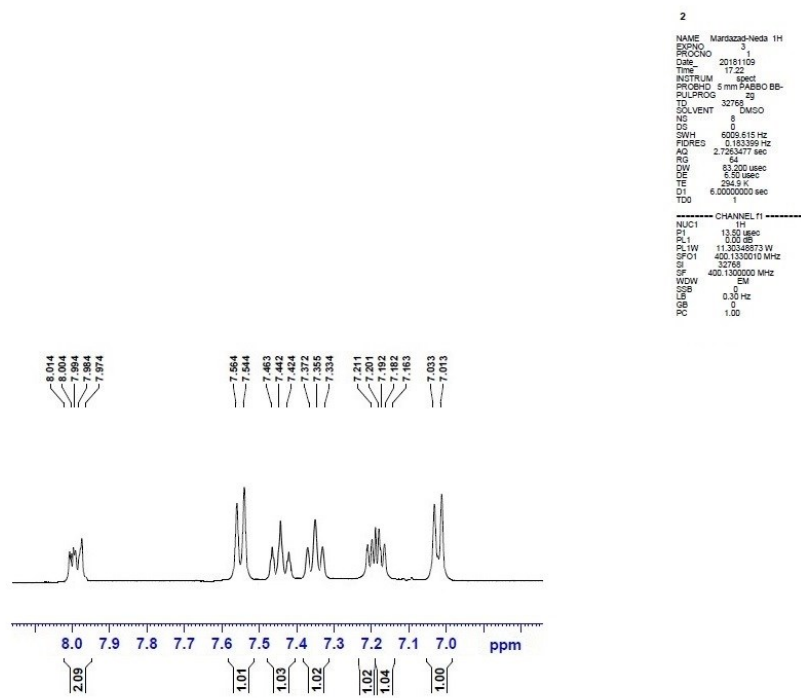

```

2
NAME Maroqaz-Neda 1H
EXPNO 1
PROCNO 1
Date_ 20181109
Time 17.22
INSTRUM spect
PROBHD 5 mm PABBO BB-
PULPROG zgpg30
TD 32768
SOLVENT DMSO
NS 8
DS 0
SWH 6005.615 Hz
FIDRES 0.183399 Hz
AQ 2.7263477 sec
RG 64
DW 63.200 usec
DE 6.50 usec
TE 294.2 K
D1 6.0000000 sec
TDO 1
----- CHANNEL f1 -----
NUC1 1H
P1 13.50 usec
PL1 0.00 dB
PL1W 11.30345873 W
SFO1 400.1300010 MHz
SI 32768
SF 400.1300000 MHz
WDW EM
SSB 0
LB 0.30 Hz
GB 0
PC 1.00

```

Fig s19 <sup>1</sup>H-NMR spectrum of 6b

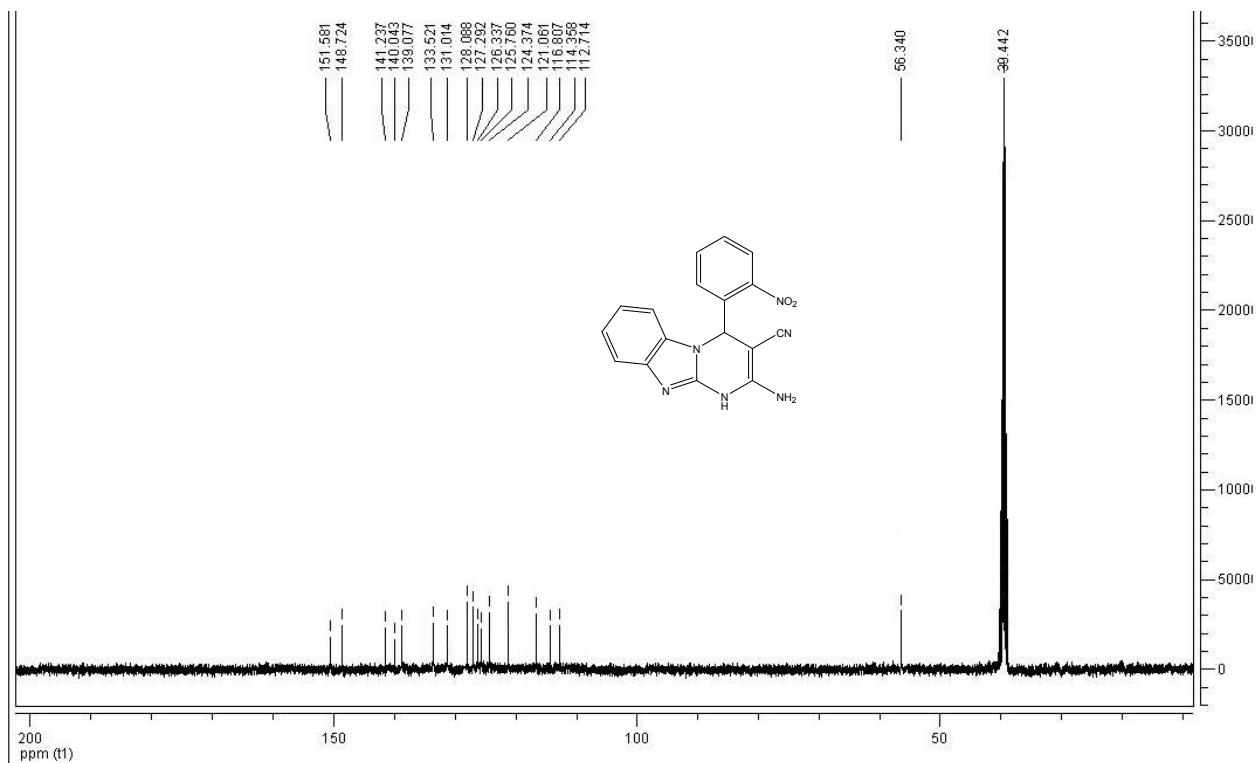

Fig s20  $^{13}\text{C-NMR}$  spectrum of 6b

### Spectral data of 6c

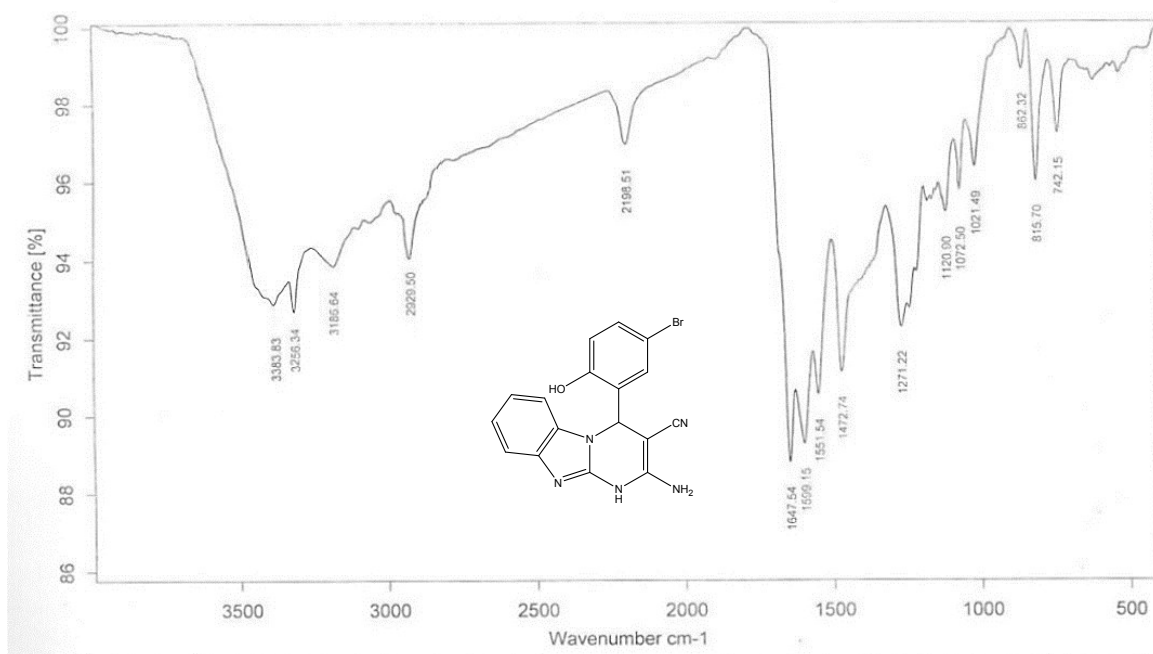

Fig. s21 FTIR spectrum of 6c



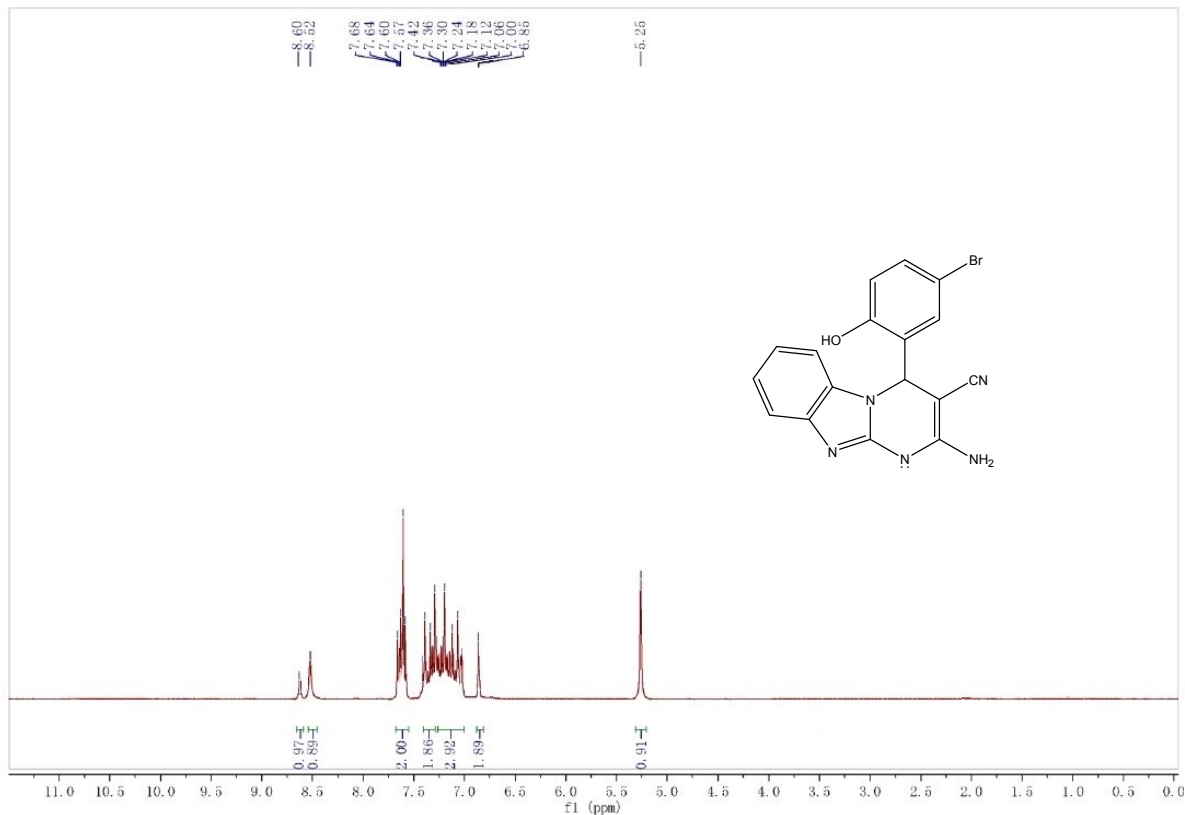

Fig s22 <sup>1</sup>H-NMR spectrum of 6c

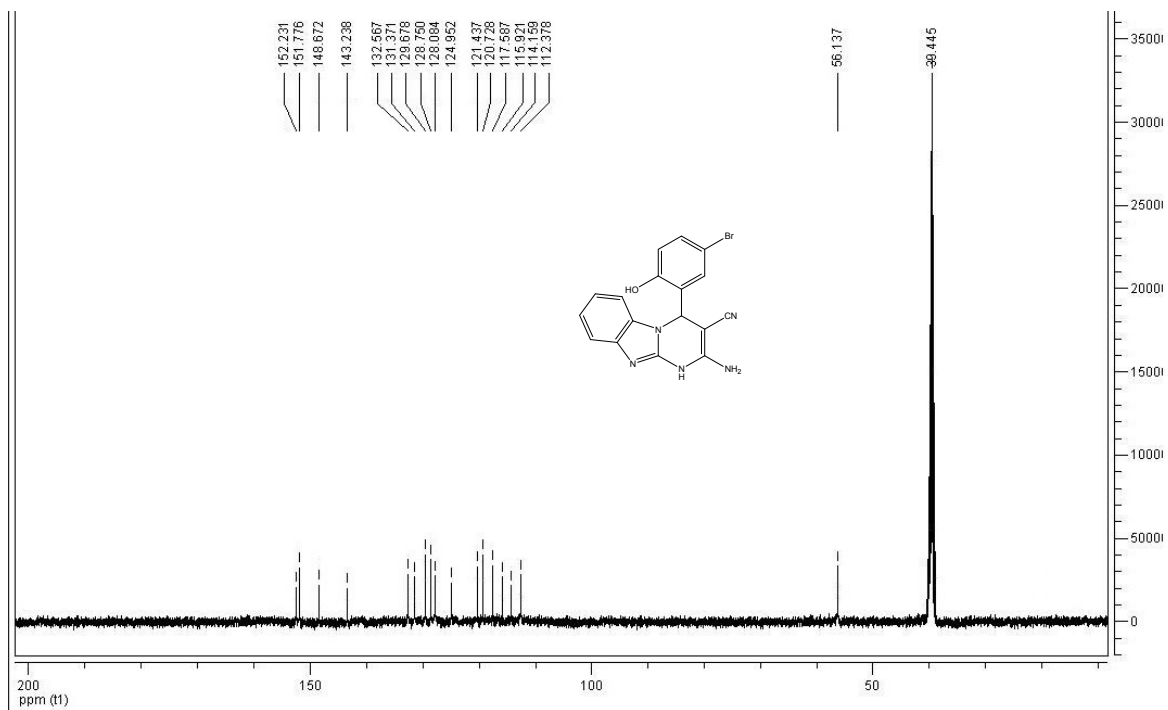

Fig s23 <sup>13</sup>C-NMR spectrum of 6c

## Spectral data of 6d

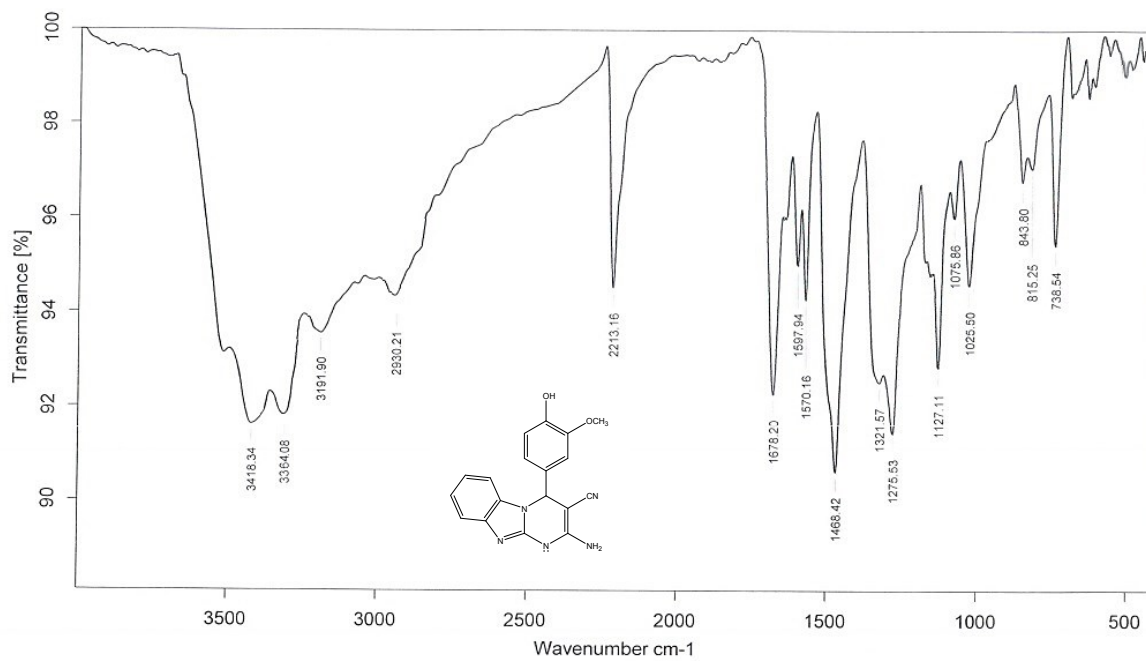

Fig. s24 FTIR spectrum of 6d

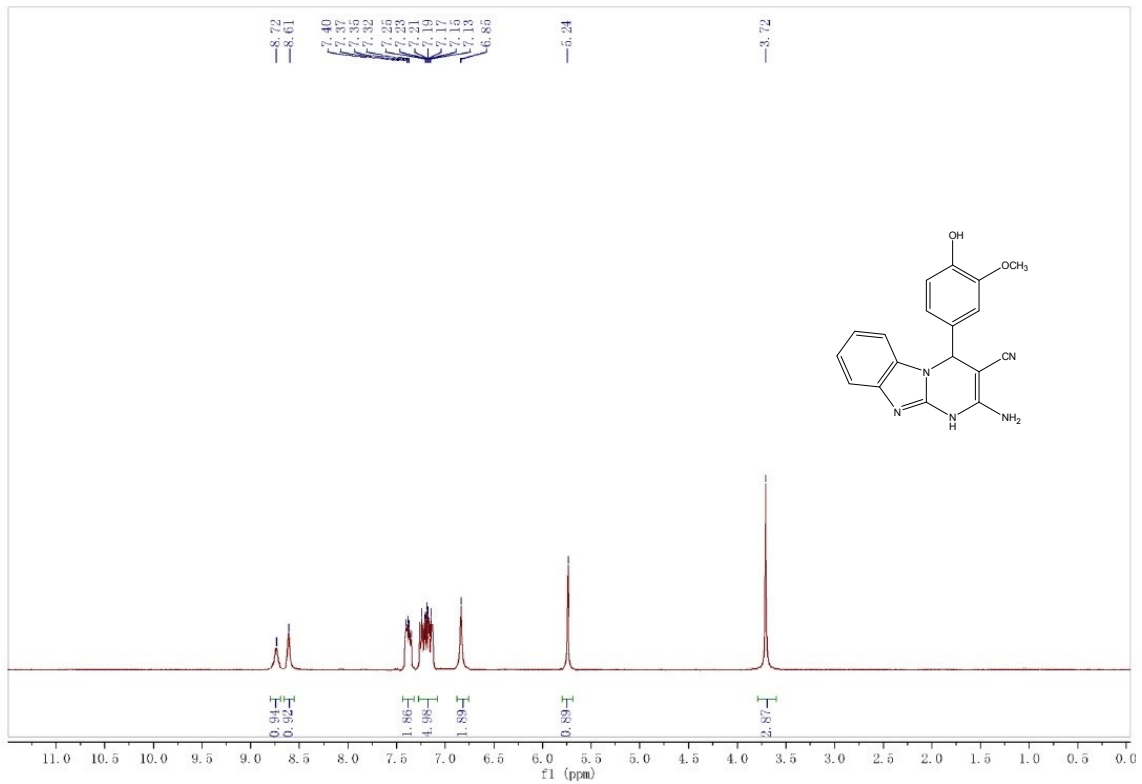

Fig s25 <sup>1</sup>H-NMR spectrum of 6d

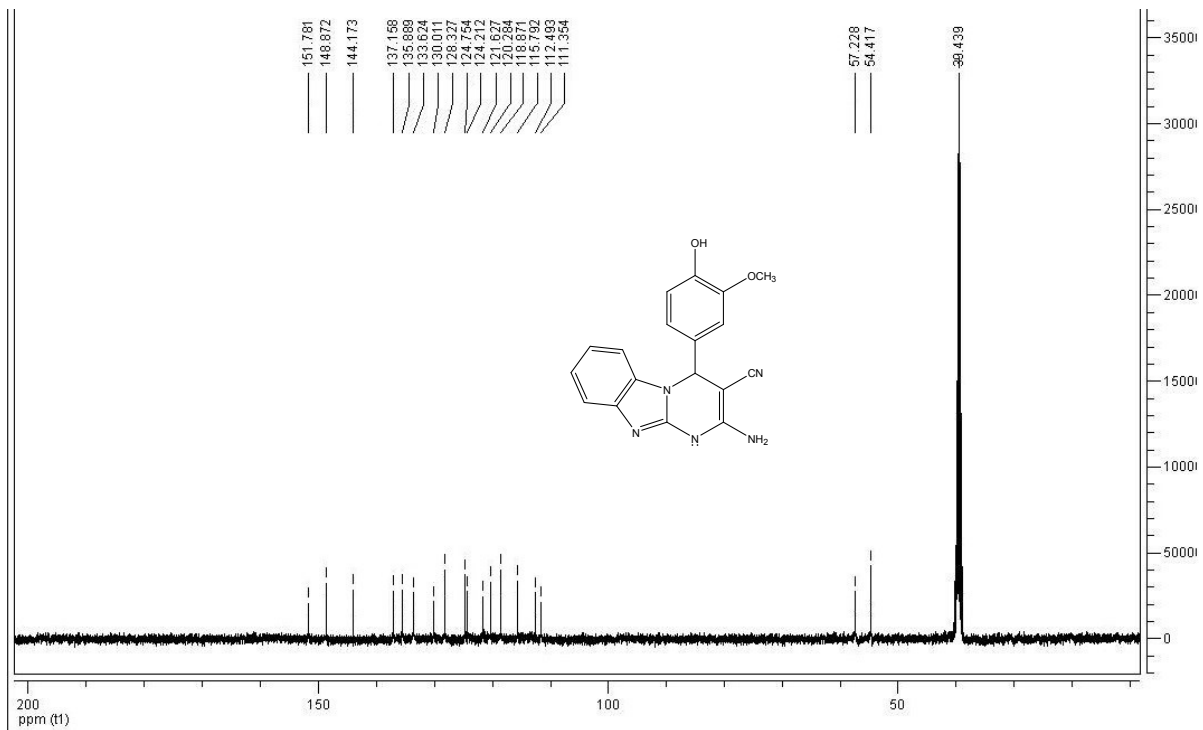

Fig s26 <sup>13</sup>C-NMR spectrum of 6d

## Spectral data of 7a

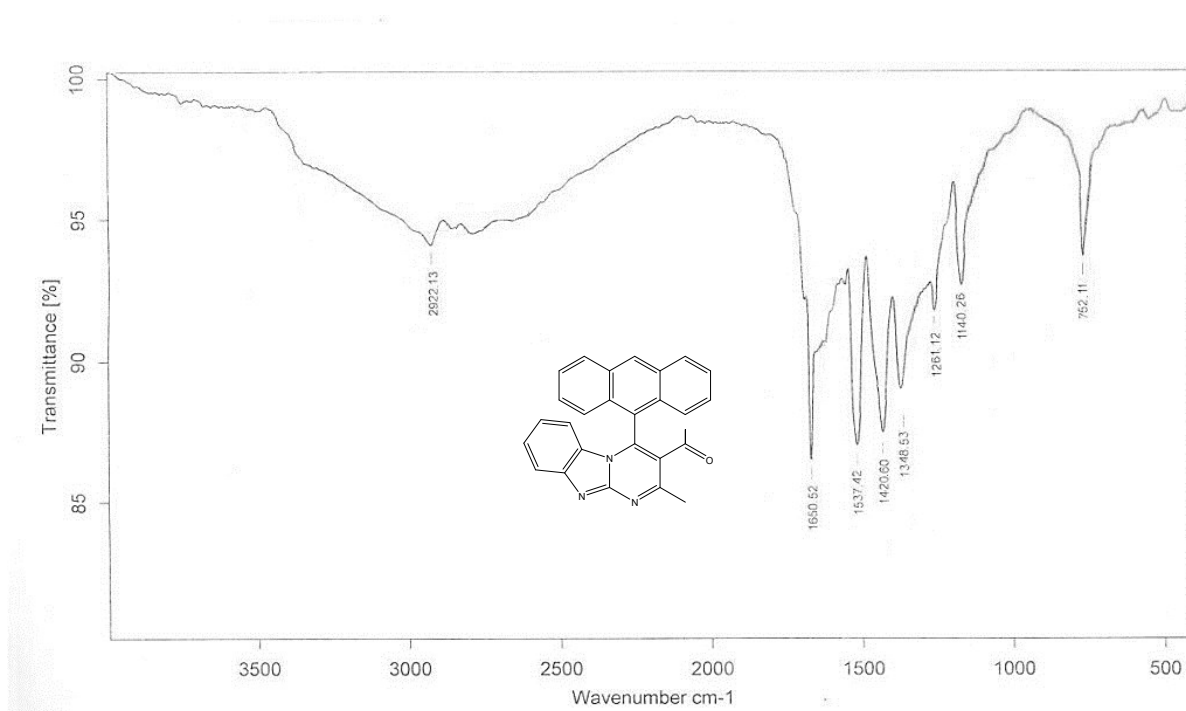

Fig. s27 FTIR spectrum of 7a

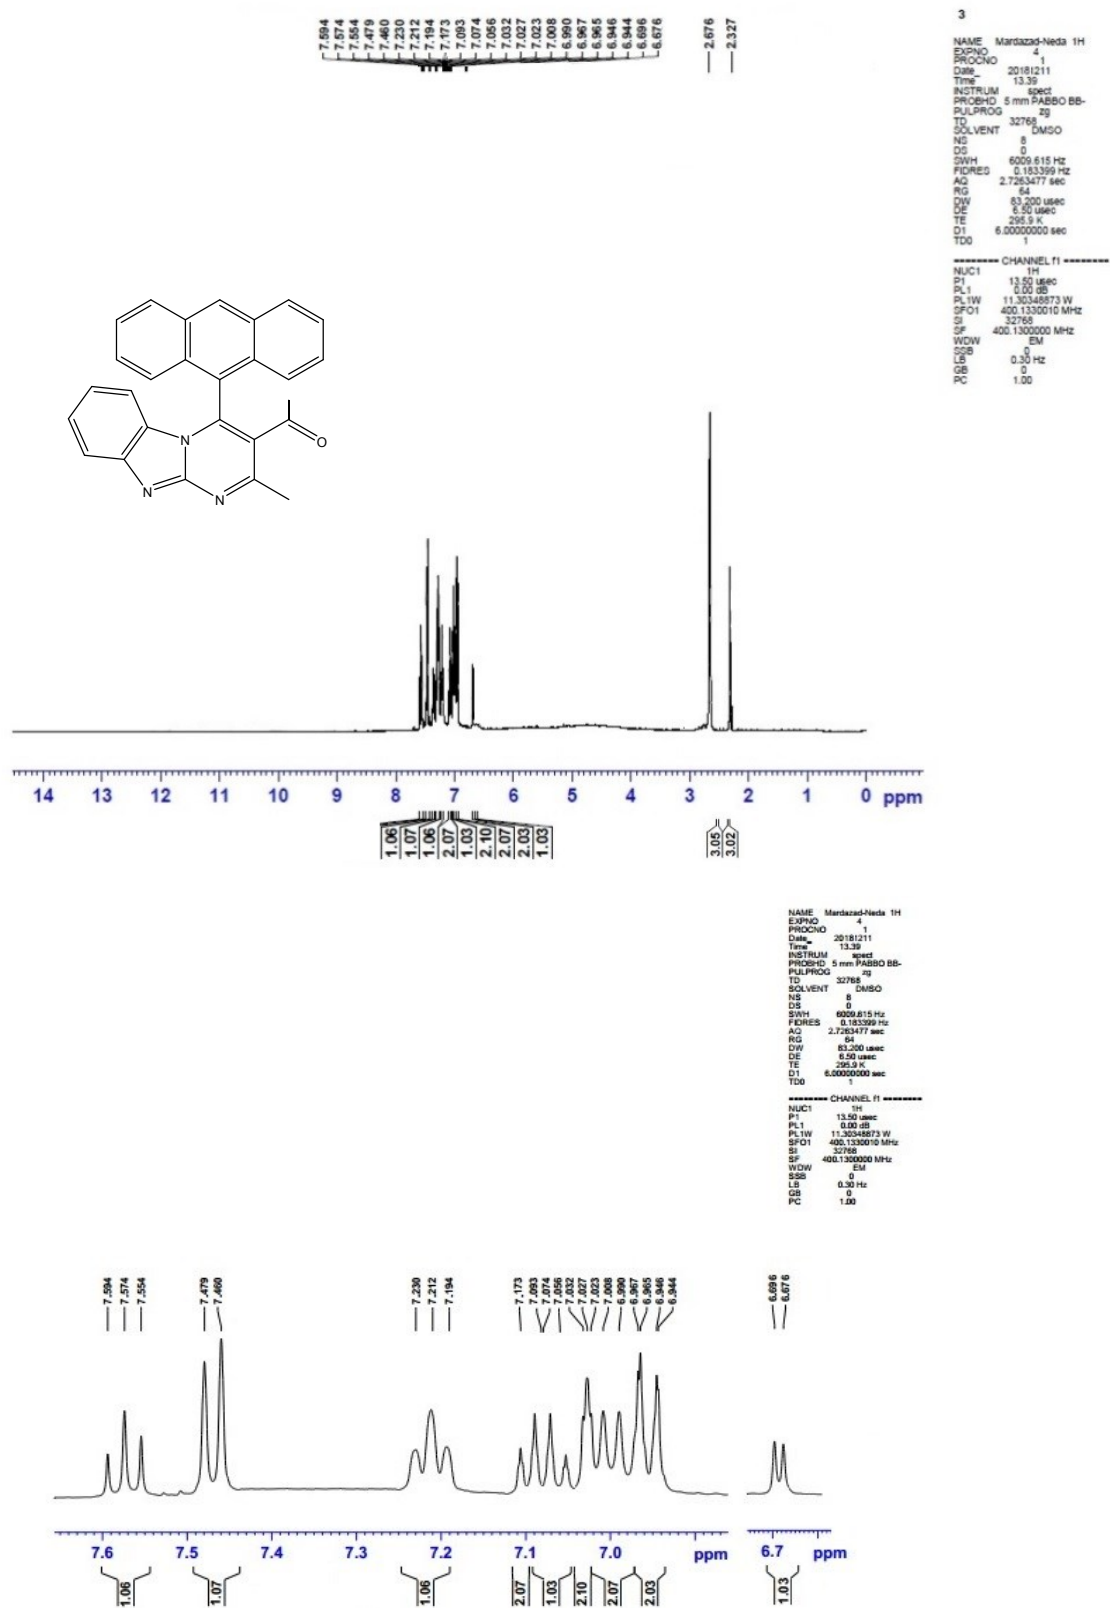

Fig s28 <sup>1</sup>H-NMR spectrum of 7a

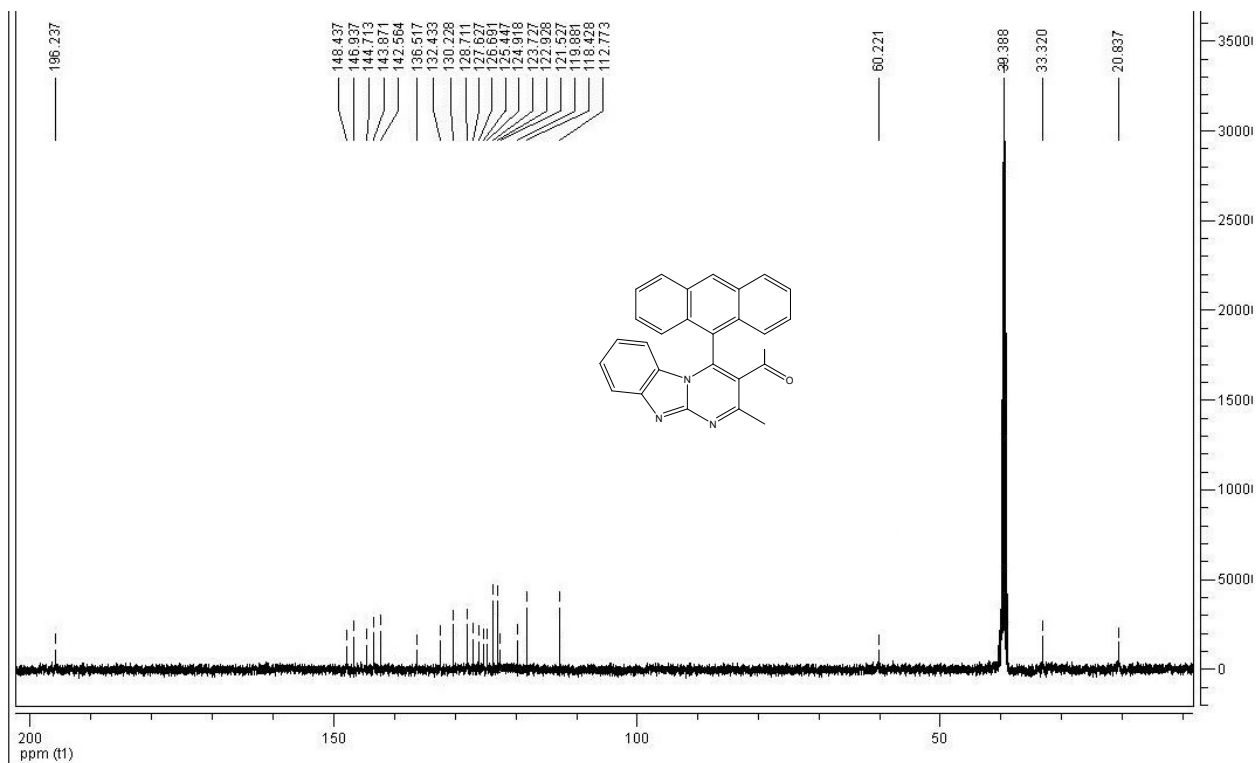

Fig s29 <sup>13</sup>C-NMR spectrum of 7a

### Spectral data of 7b

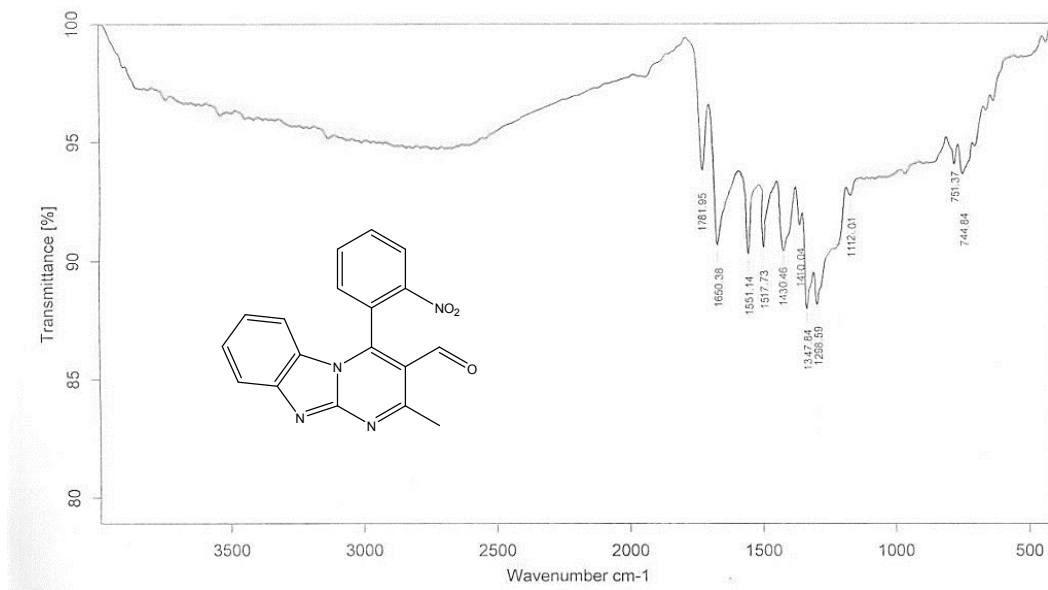

Fig. s30 FTIR spectrum of 7b

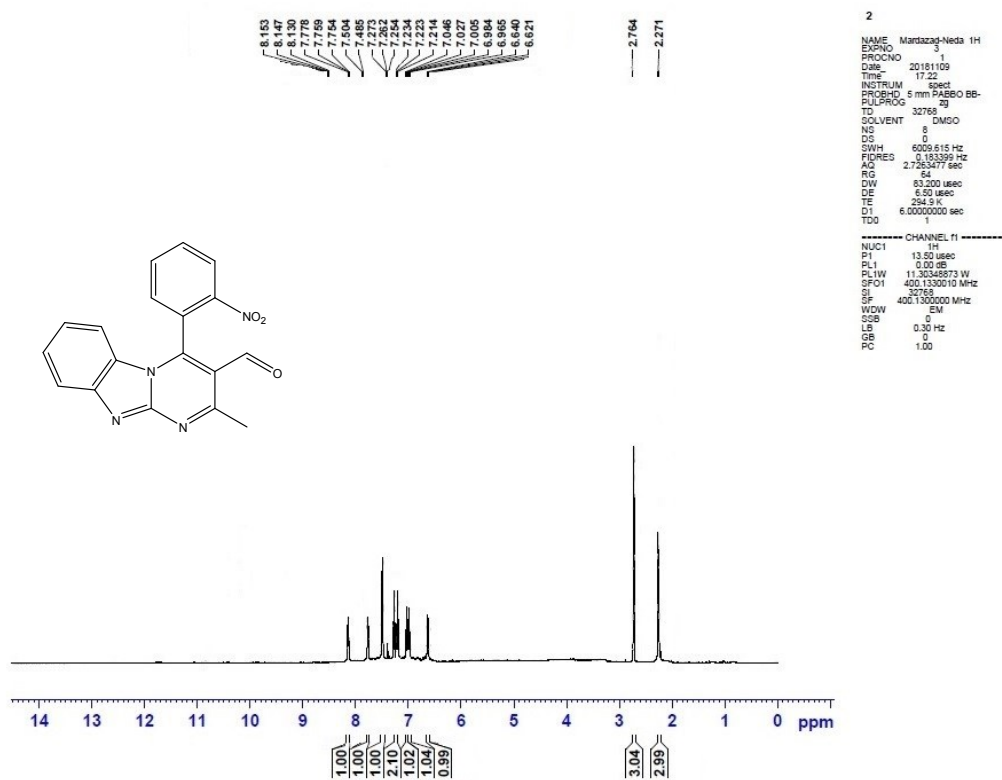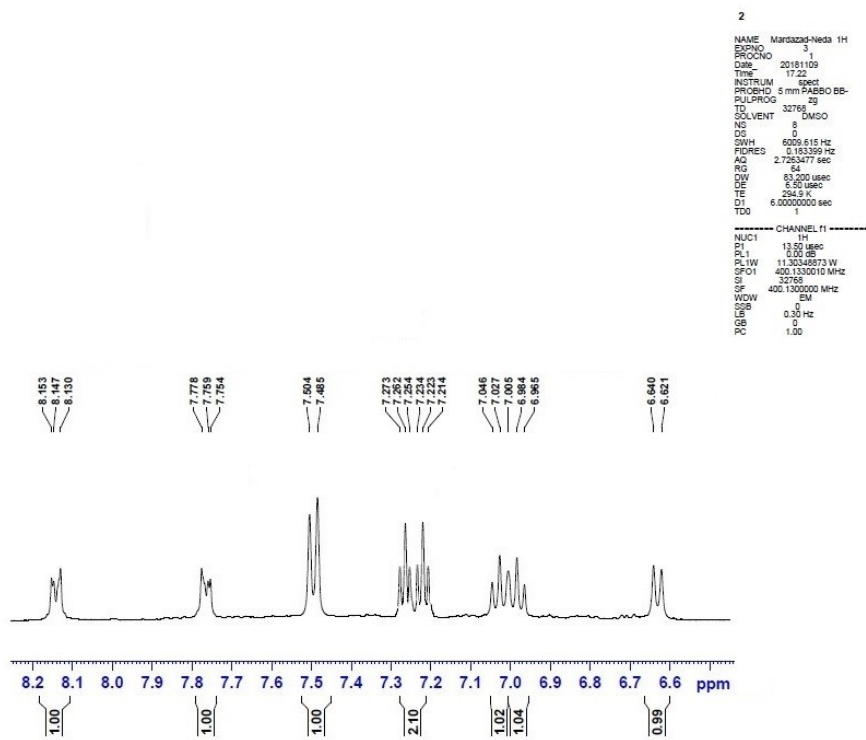

Fig s31 <sup>1</sup>H-NMR spectrum of 7b

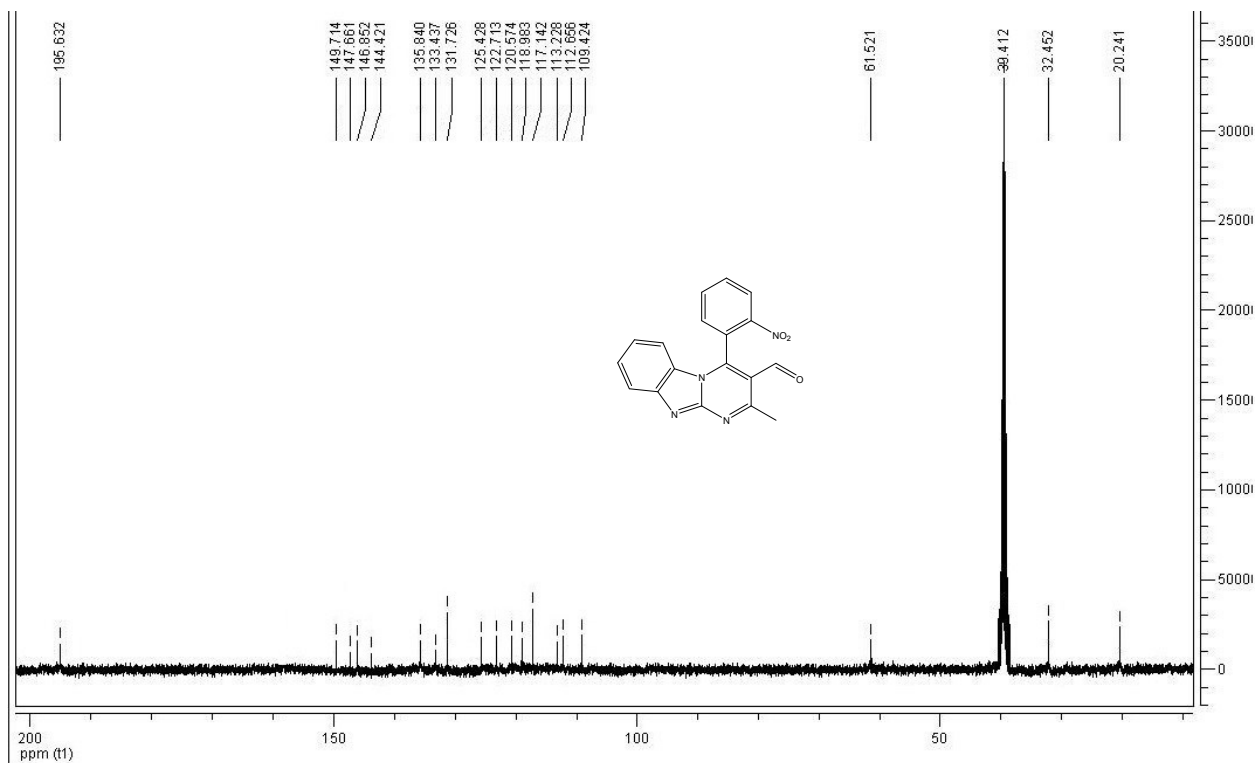

Fig s32 <sup>13</sup>C-NMR spectrum of 7b

### Spectral data of 7c

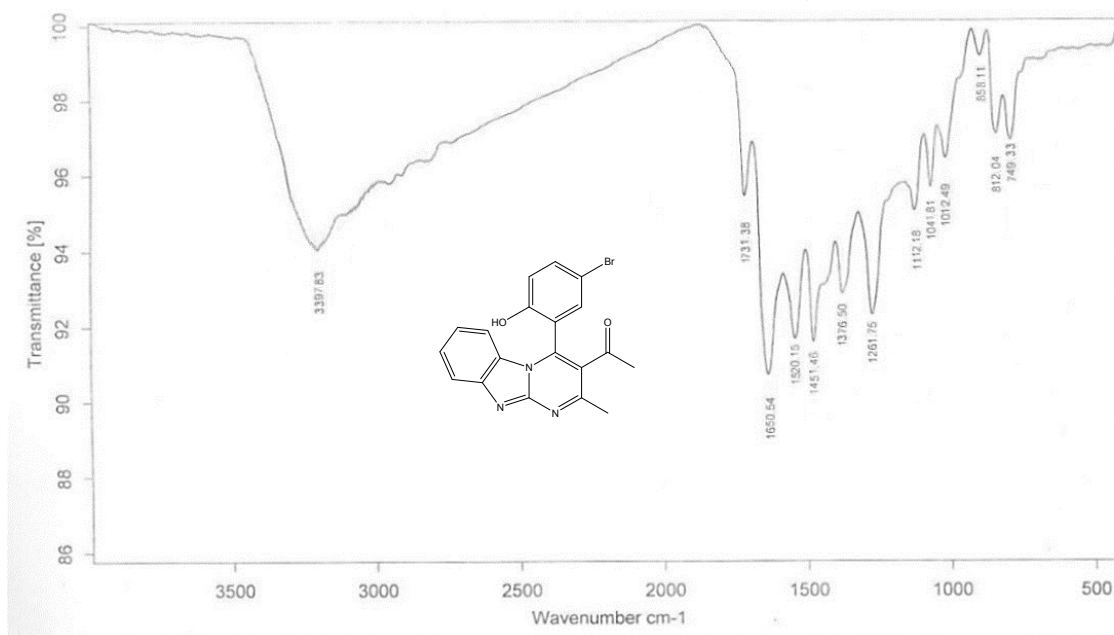

Fig. s33 FTIR spectrum of 7c



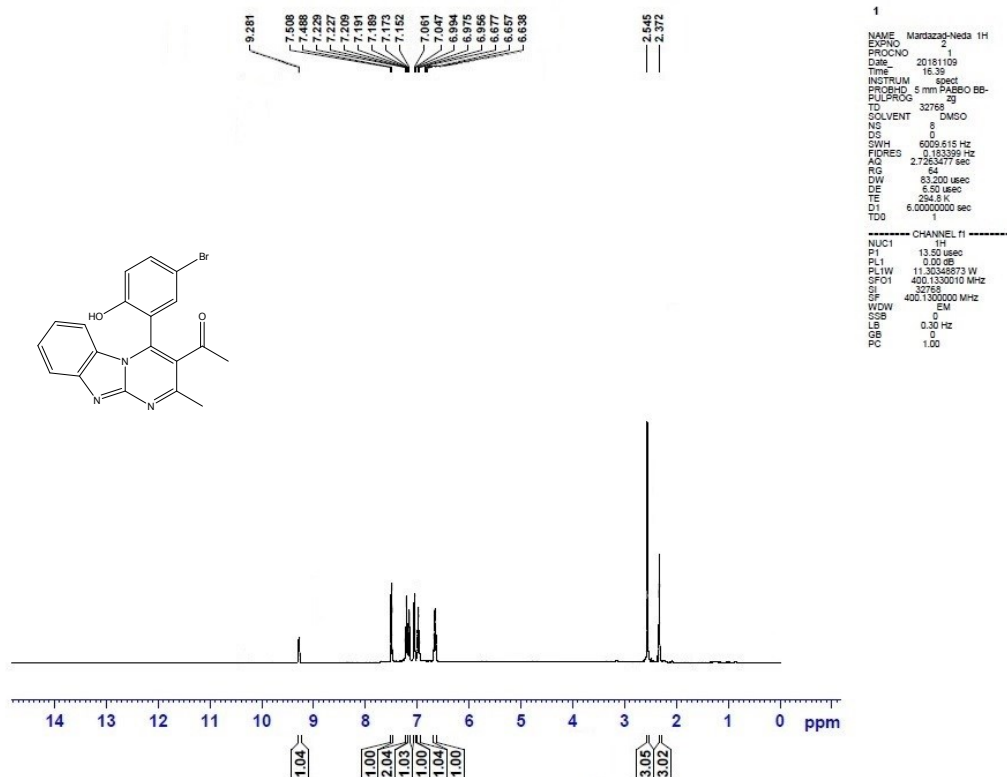

```

1
NAME Mardazad-Neda 1H
EXPNO 2
PROCNO 1
Date_ 20181109
Time 16.39
INSTRUM spect
PROBHD 5 mm PABBO BB-
PULPROG zg
TD 32768
SOLVENT DMSO
NS 8
DS 8
SWH 6009.615 Hz
FIDRES 0.183399 Hz
AQ 2.7263477 sec
RG 64
DW 83.200 usec
DE 6.50 usec
TE 294.2 K
D1 6.0000000 sec
TDO
----- CHANNEL f1 -----
NUC1 1H
P1 13.50 usec
PL1 0.00 dB
PL1W 11.30348873 W
SFO1 400.1300010 MHz
SI 32768
SF 400.1300000 MHz
WDW EM
SSB 0
LB 0.30 Hz
GB 0
PC 1.00

```

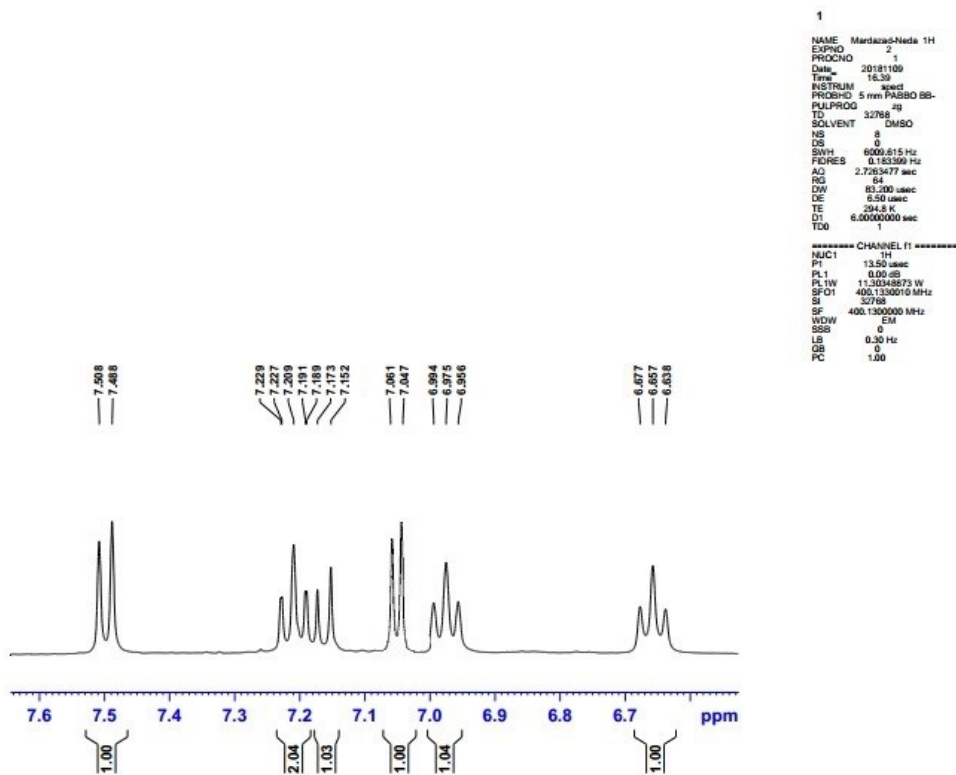

```

1
NAME Mardazad-Neda 1H
EXPNO 2
PROCNO 1
Date_ 20181109
Time 16.39
INSTRUM spect
PROBHD 5 mm PABBO BB-
PULPROG zg
TD 32768
SOLVENT DMSO
NS 8
DS 8
SWH 6009.615 Hz
FIDRES 0.183399 Hz
AQ 2.7263477 sec
RG 64
DW 83.200 usec
DE 6.50 usec
TE 294.2 K
D1 6.0000000 sec
TDO 1
----- CHANNEL f1 -----
NUC1 1H
P1 13.50 usec
PL1 0.00 dB
PL1W 11.30348873 W
SFO1 400.1300010 MHz
SI 32768
SF 400.1300000 MHz
WDW EM
SSB 0
LB 0.30 Hz
GB 0
PC 1.00

```

Fig s34 <sup>1</sup>H-NMR spectrum of 7c

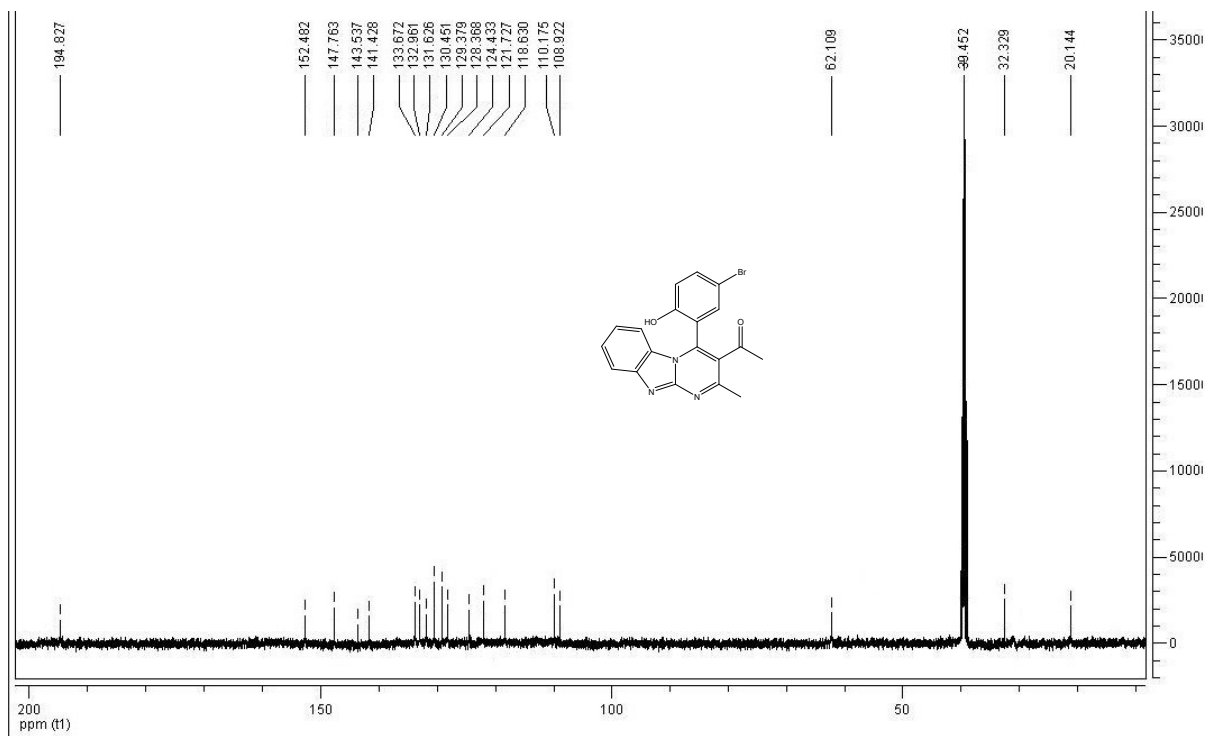

Fig s35 <sup>13</sup>C-NMR spectrum of 7c

### Spectral data of 7d

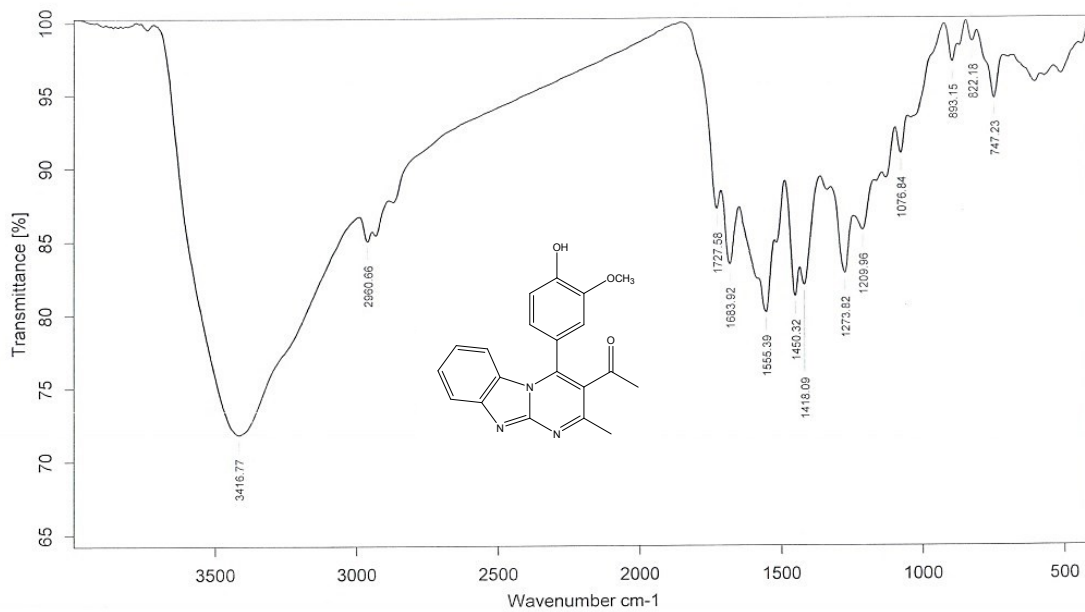

Fig. s36 FTIR spectrum of 7d

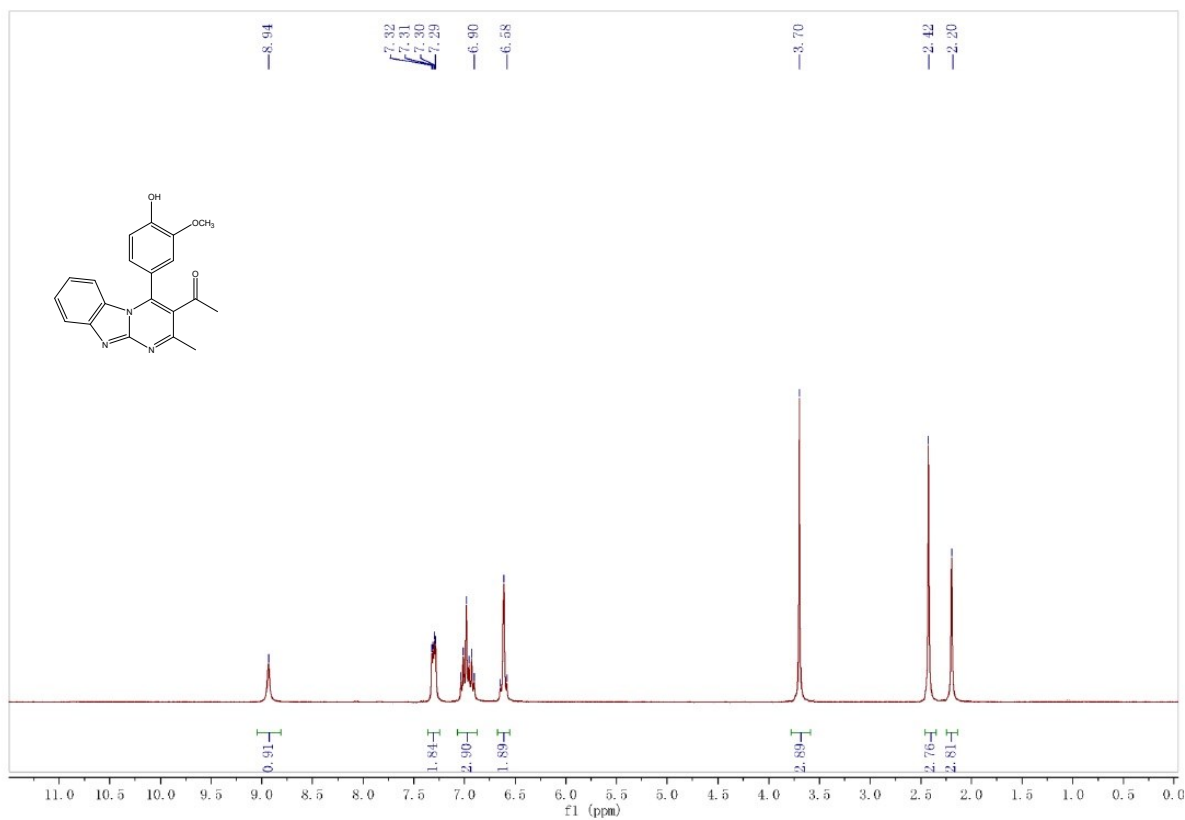

Fig s37 <sup>1</sup>H-NMR spectrum of 7d

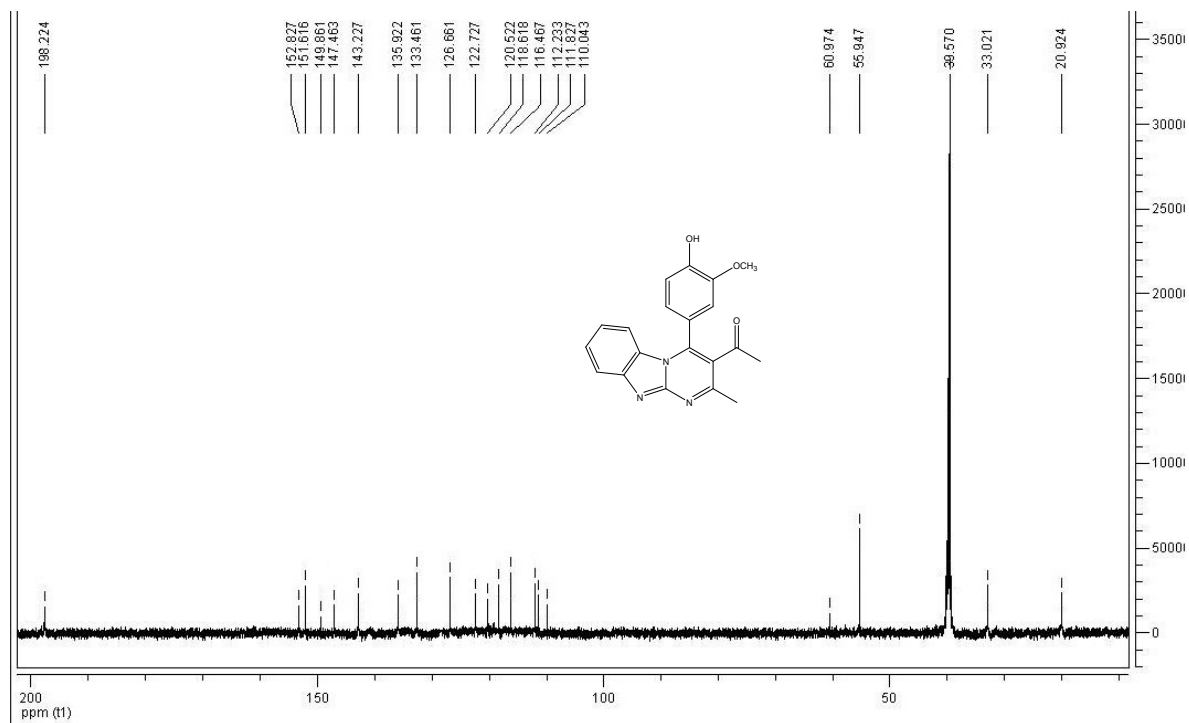

Fig s38 <sup>13</sup>C-NMR spectrum of 7d

## Spectral data of 8a

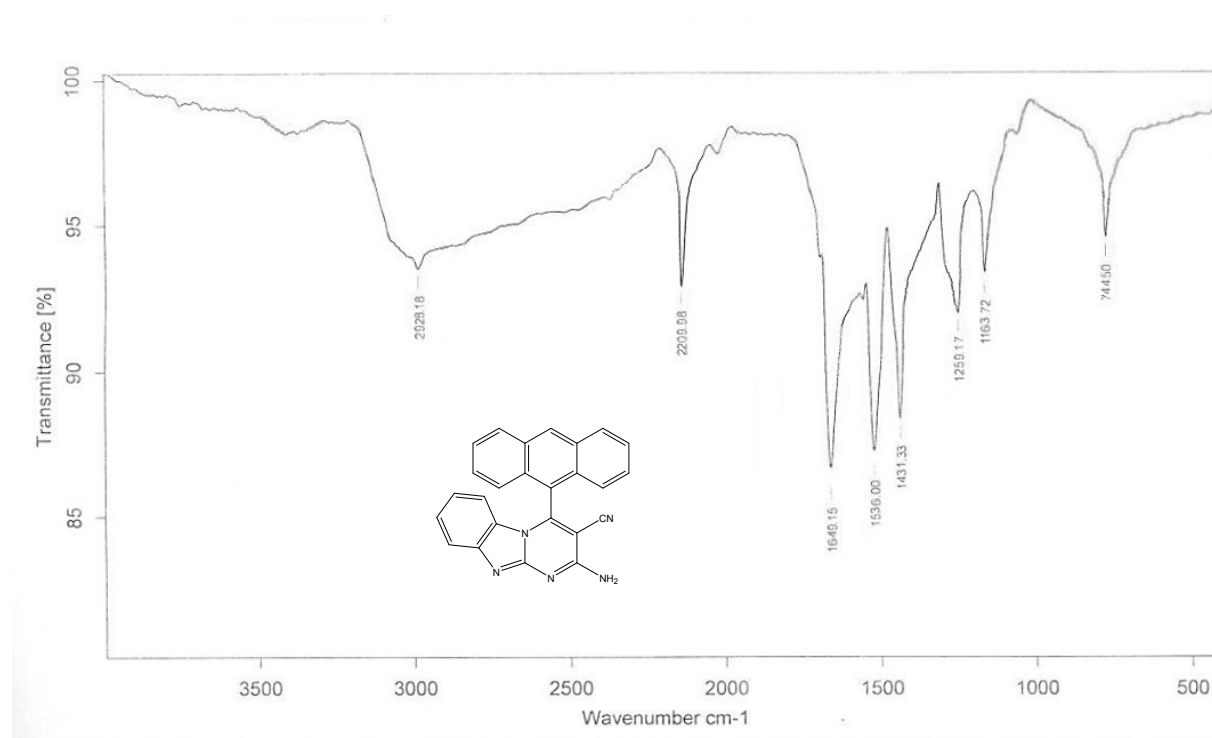

Fig. s39 FTIR spectrum of 8a

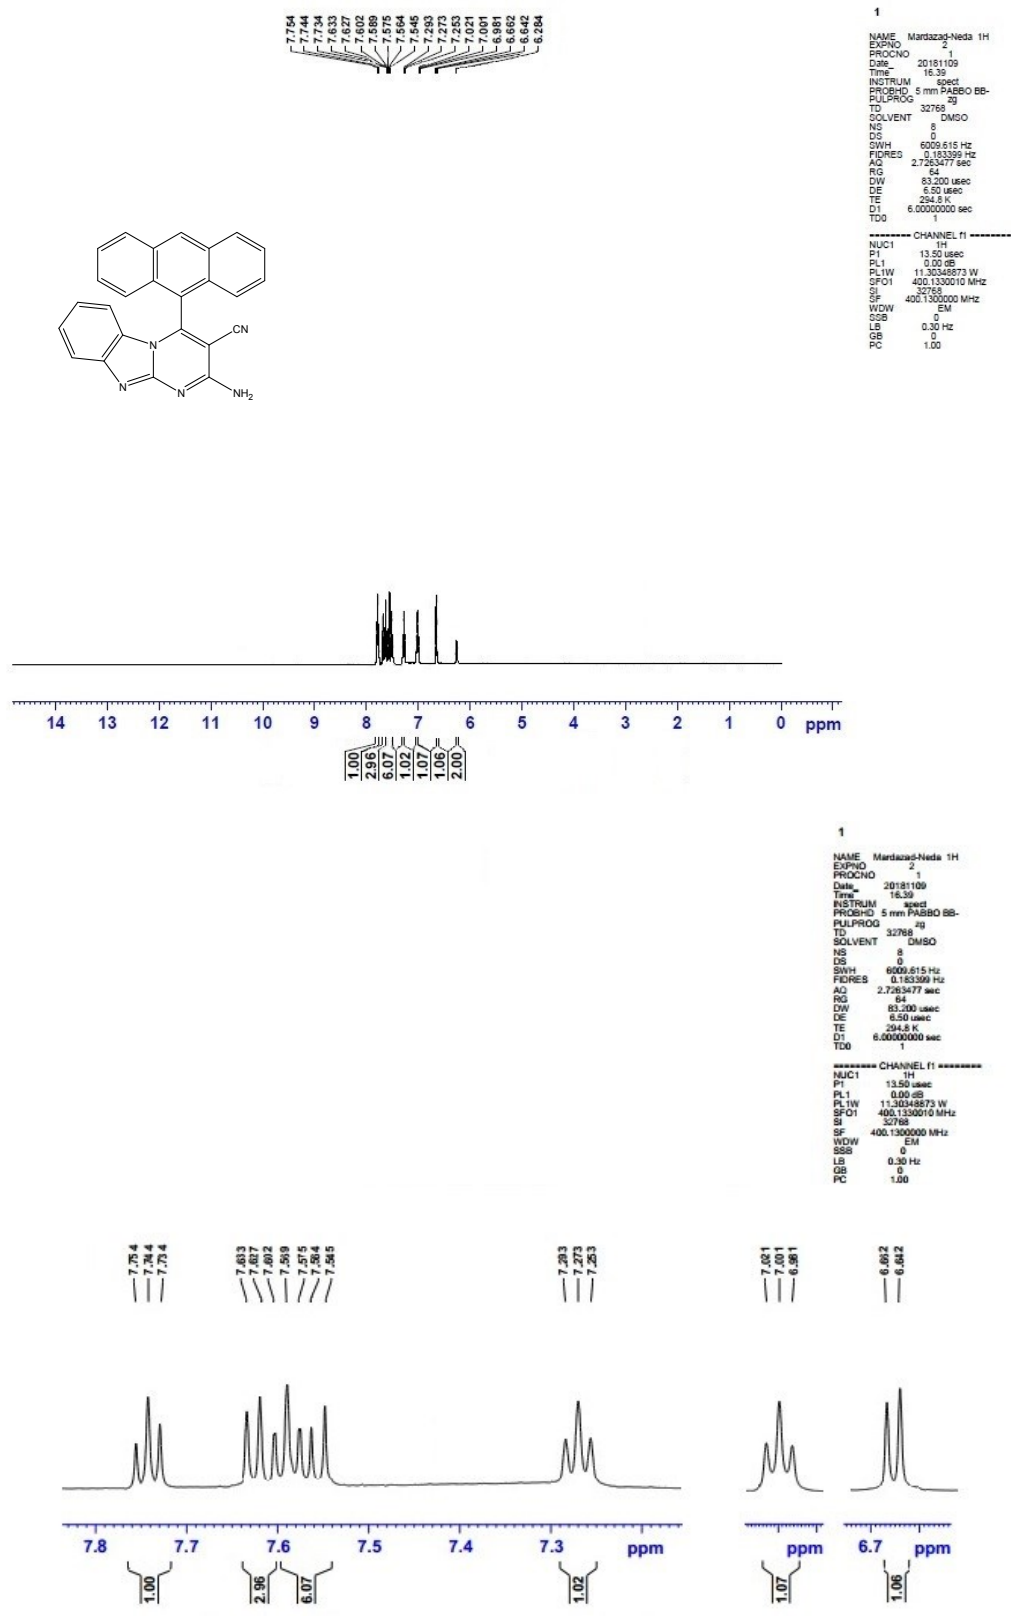

Fig s40 <sup>1</sup>H-NMR spectrum of 8a

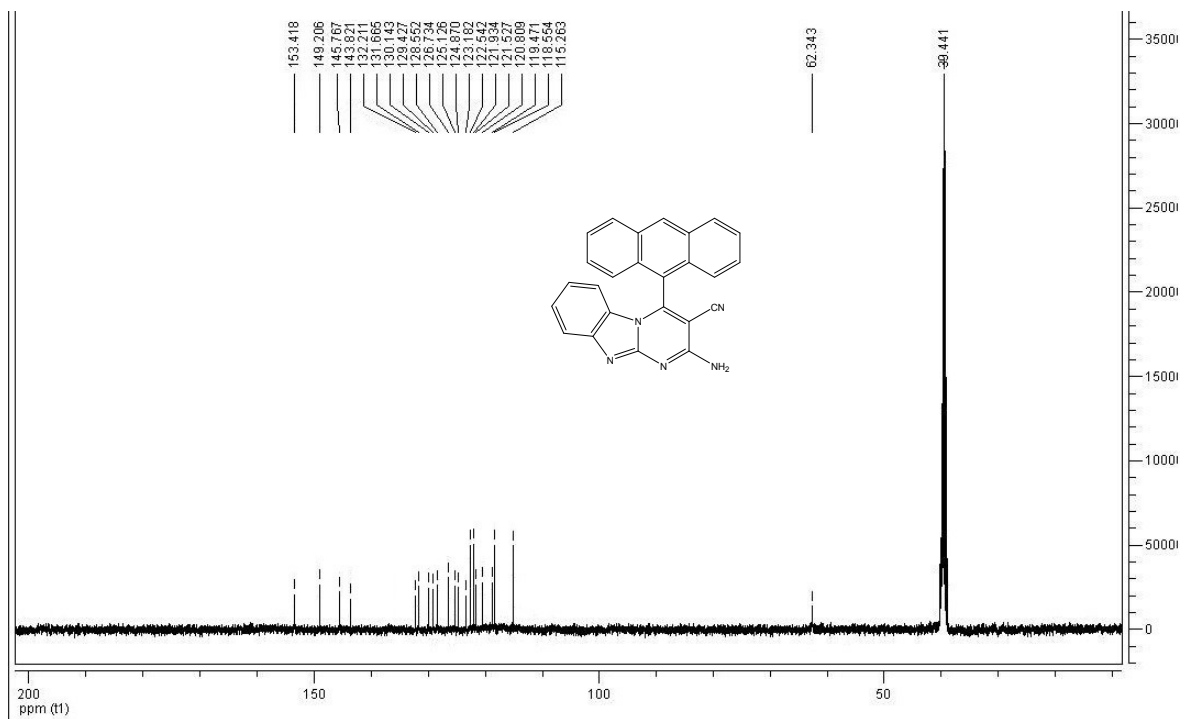

Fig s41  $^{13}\text{C}$ -NMR spectrum of 8a

### Spectral data of 8b

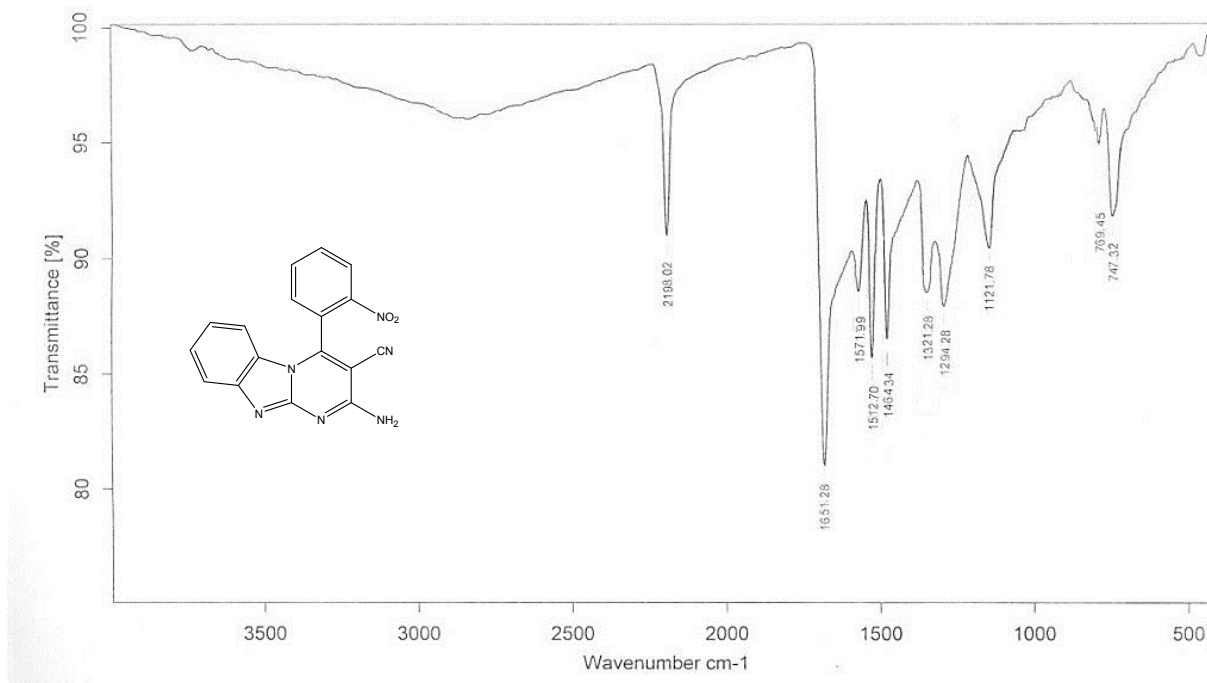

Fig. s42 FTIR spectrum of 8b

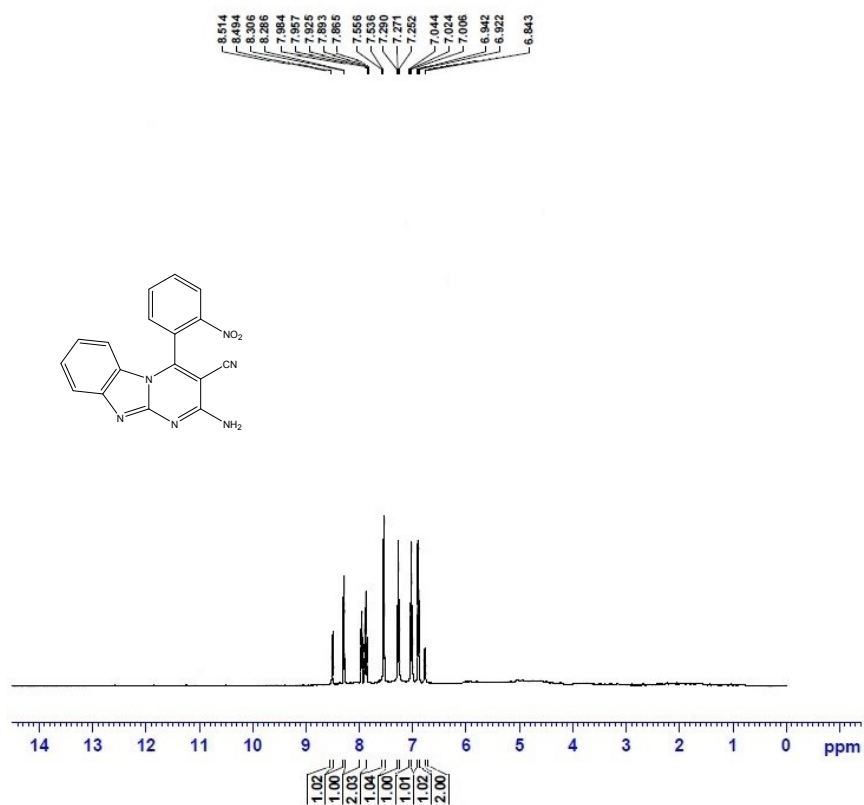

```

2
NAME Mar0323-Neda 1H
EXPNO 1
PROCNO 1
Date_ 20180929
Time 16:12
INSTRUM spect
PROBHD 5 mm PABBO BB-
PULPROG zg30
TD 32768
SOLVENT DMSO
NS 8
DS 0
SWH 6009.615 Hz
FIDRES 0.193399 Hz
AQ 2.7263477 sec
RG 64
DQ 81.200 usec
DE 6.30 usec
TE 292.5 K
D1 6.0000000 sec
TDO 1
----- CHANNEL f1 -----
NUC1 1H
P1 13.50 usec
PL1 0.00 dB
PL1W 11.30348873 W
SFO1 400.1330010 MHz
SI 32768
SF 400.1300000 MHz
WDW EM
SSB 0
GB 0.30 Hz
PC 1.00

```

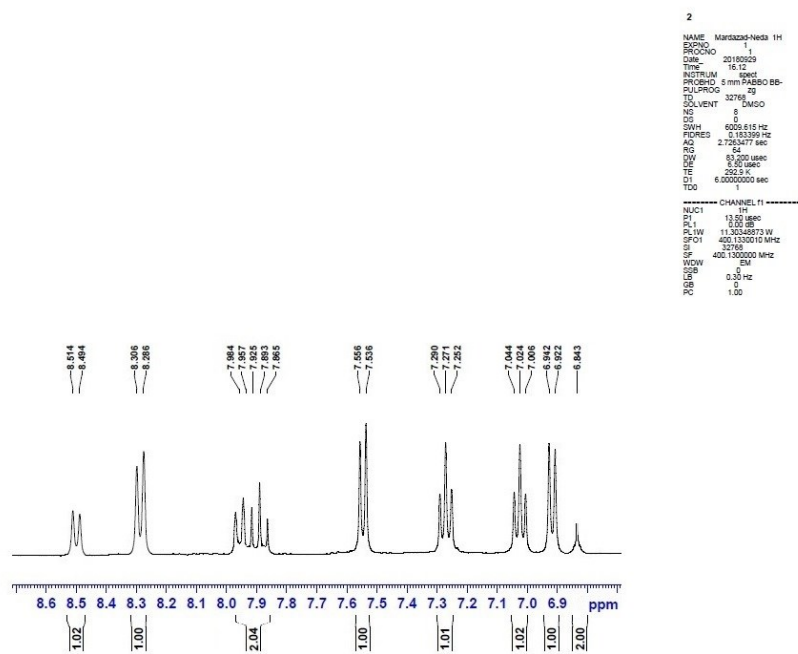

```

2
NAME Mar0323-Neda 1H
EXPNO 1
PROCNO 1
Date_ 20180929
Time 16:12
INSTRUM spect
PROBHD 5 mm PABBO BB-
PULPROG zg30
TD 32768
SOLVENT DMSO
NS 8
DS 0
SWH 6009.615 Hz
FIDRES 0.193399 Hz
AQ 2.7263477 sec
RG 64
DQ 81.200 usec
DE 6.30 usec
TE 292.5 K
D1 6.0000000 sec
TDO 1
----- CHANNEL f1 -----
NUC1 1H
P1 13.50 usec
PL1 0.00 dB
PL1W 11.30348873 W
SFO1 400.1330010 MHz
SI 32768
SF 400.1300000 MHz
WDW EM
SSB 0
GB 0.30 Hz
PC 1.00

```

Fig s43 <sup>1</sup>H-NMR spectrum of 8b

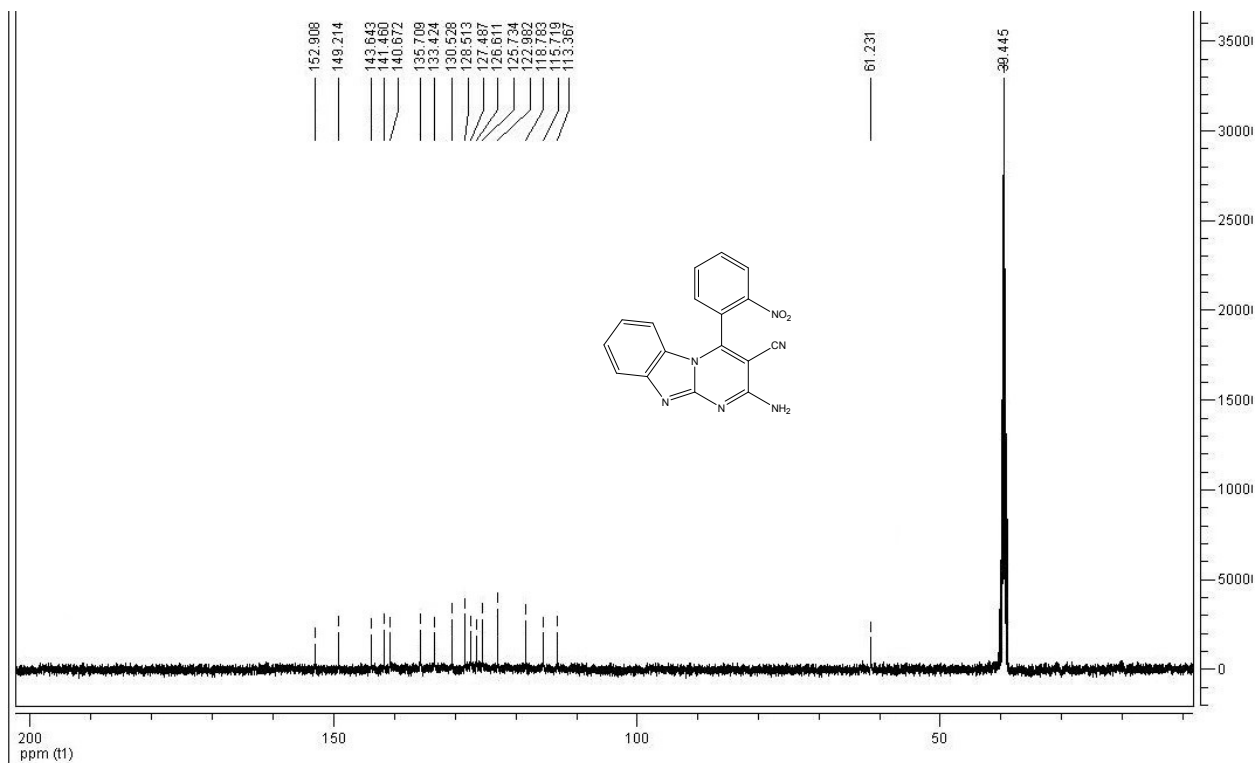

Fig s44  $^{13}\text{C}$ -NMR spectrum of 8b

### Spectral data of 8c

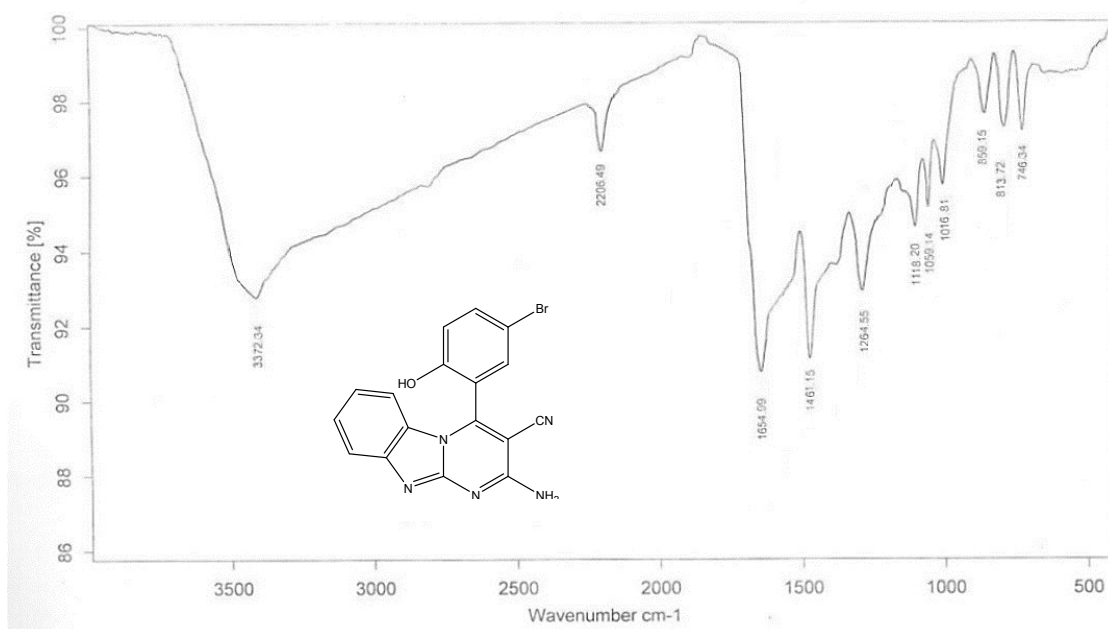

Fig. s45 FTIR spectrum of 8c



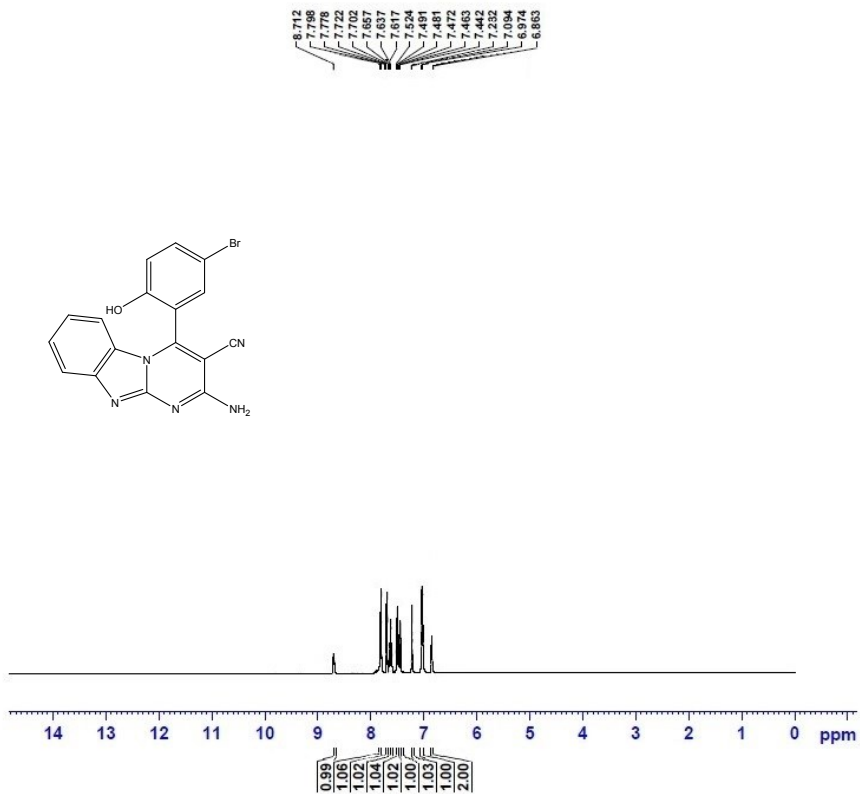

```

1
NAME  Mardazad-Neda 1H
EXPNO  2
PROCNO  1
Date_   20181109
Time    16.39
INSTRUM spect
PROBHD  5 mm PABBO BB-
PULPROG zg
TD       32768
SOLVENT DMSO
DS       0
NS       8
SWH     6009.615 Hz
FIDRES  0.183399 Hz
AQ      2.7283477 sec
RG       64
DW      83.200 usec
DE       6.50 usec
TE      294.8 K
D1      6.00000000 sec
TD0     1
----- CHANNEL f1 -----
NUC1    1H
P1      13.50 usec
PL1     0.00 dB
PL1W    11.30348873 W
SFO1    400.1330010 MHz
SI      32768
SF      400.1300000 MHz
WDW     EM
SSB     0
LB      0.30 Hz
GB      0
PC      1.00

```

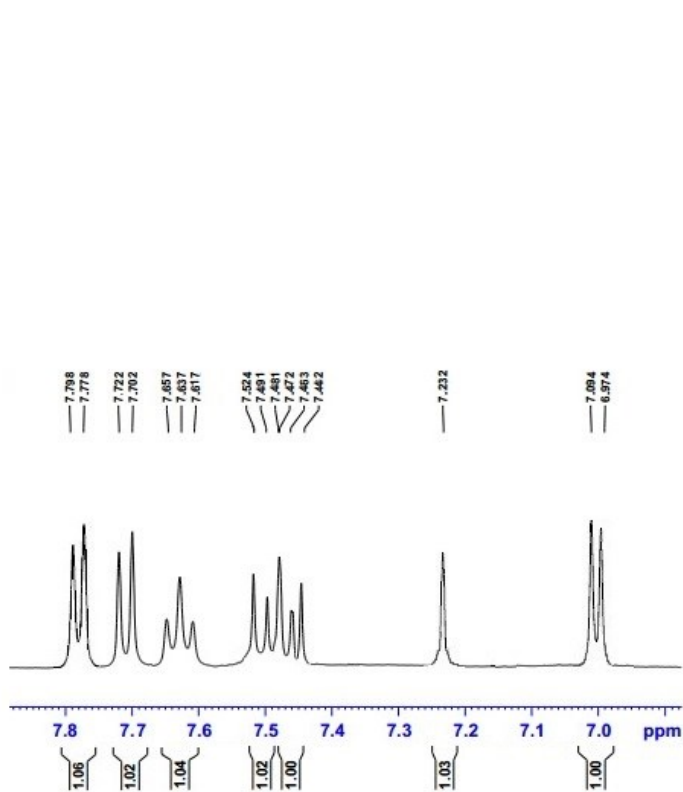

```

1
NAME  Mardazad-Neda 1H
EXPNO  2
PROCNO  1
Date_   20181109
Time    16.39
INSTRUM spect
PROBHD  5 mm PABBO BB-
PULPROG zg
TD       32768
SOLVENT DMSO
DS       0
NS       8
SWH     6009.615 Hz
FIDRES  0.183399 Hz
AQ      2.7283477 sec
RG       64
DW      83.200 usec
DE       6.50 usec
TE      294.8 K
D1      6.00000000 sec
TD0     1
----- CHANNEL f1 -----
NUC1    1H
P1      13.50 usec
PL1     0.00 dB
PL1W    11.30348873 W
SFO1    400.1330010 MHz
SI      32768
SF      400.1300000 MHz
WDW     EM
SSB     0
LB      0.30 Hz
GB      0
PC      1.00

```

Fig s46 <sup>1</sup>H-NMR spectrum of 8c

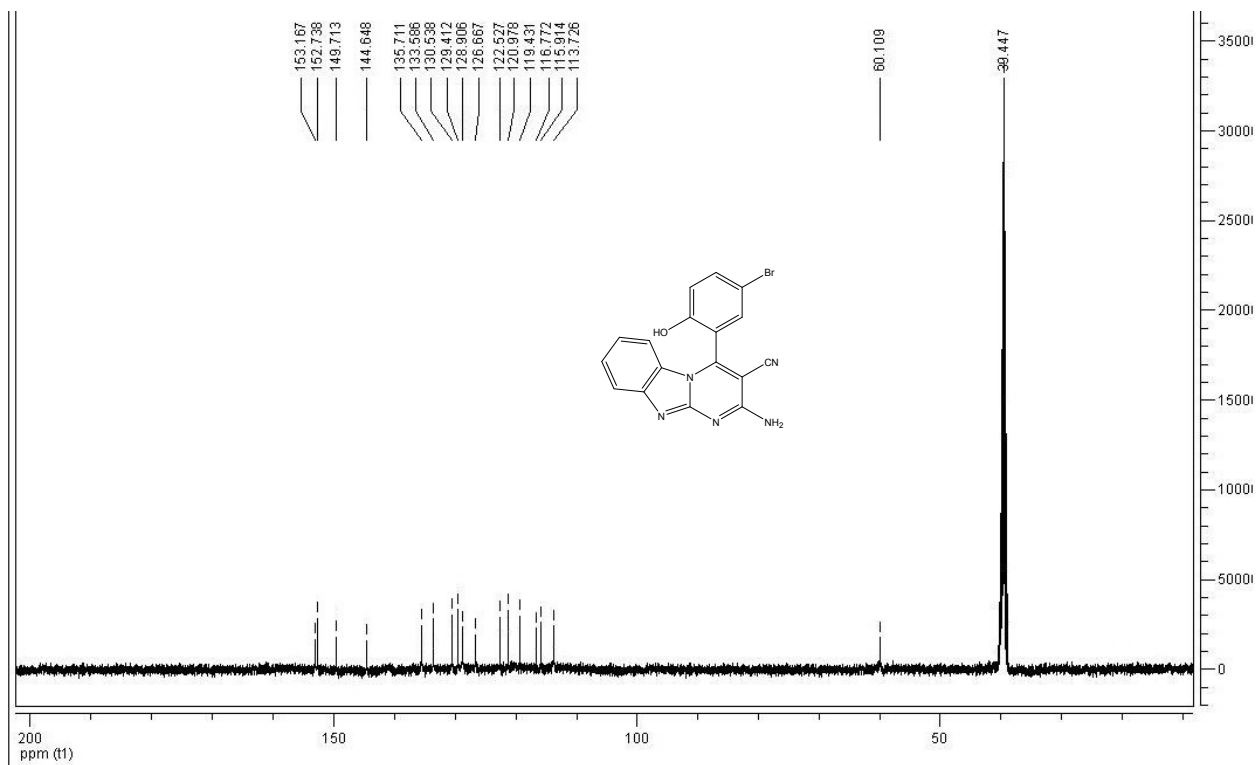

Fig s47  $^{13}\text{C}$ -NMR spectrum of 8c

### Spectral data of 8d

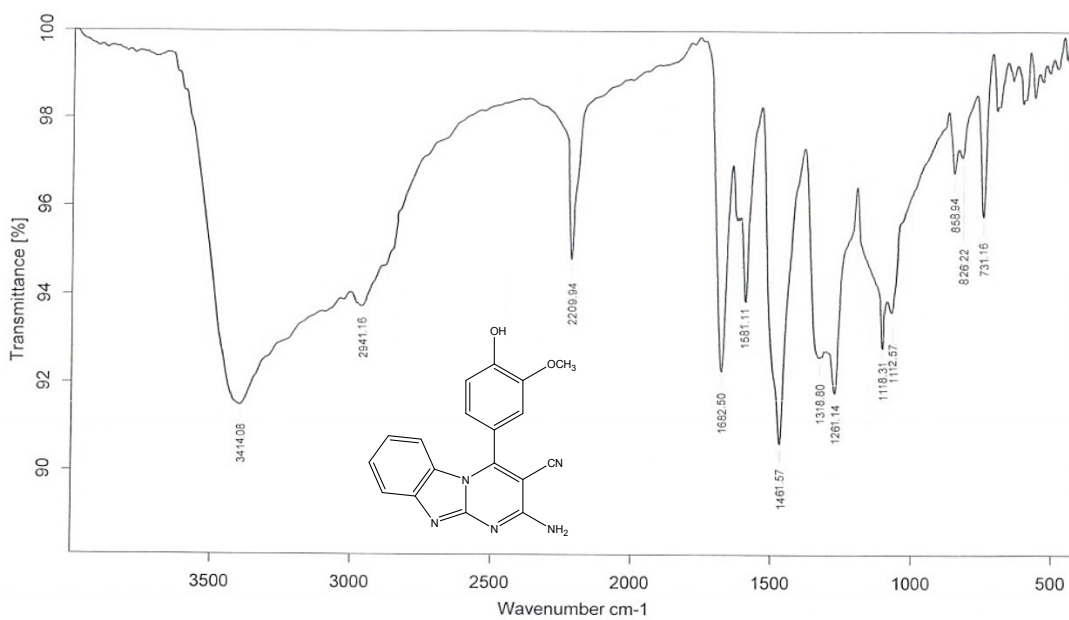

Fig. s48 FTIR spectrum of 8d

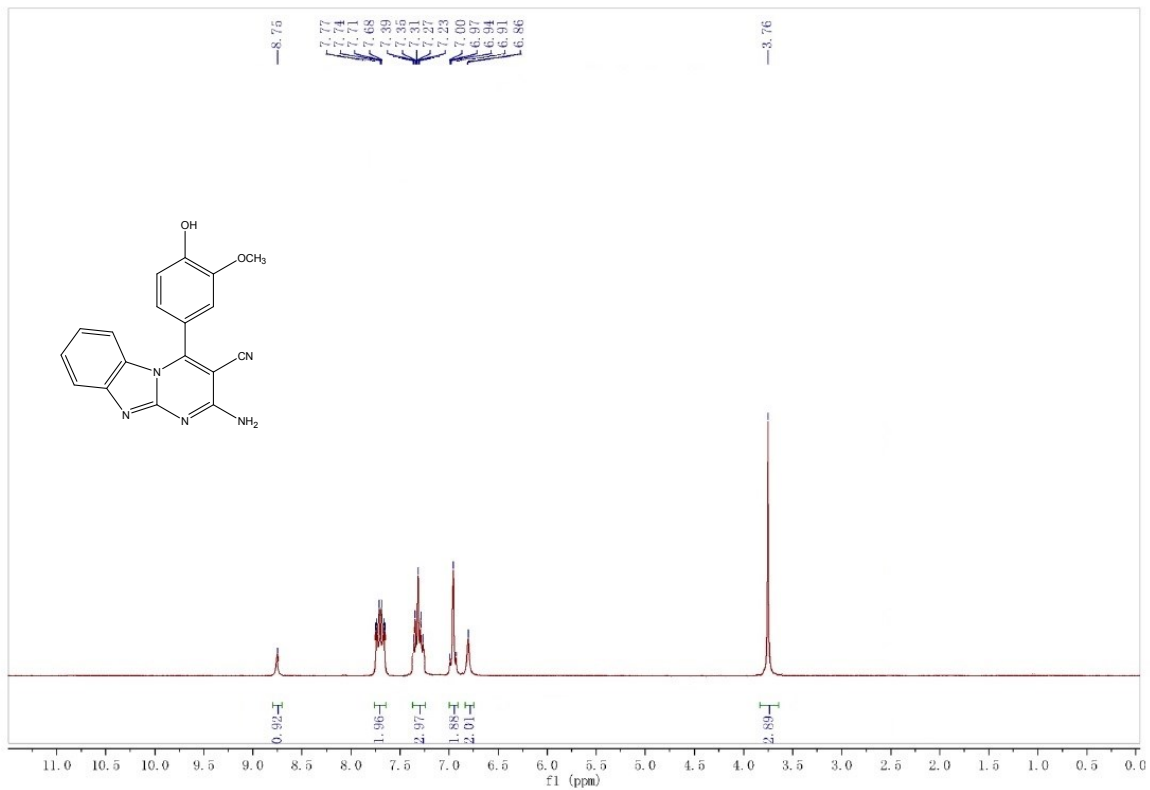

Fig s49 <sup>1</sup>H-NMR spectrum of 8d

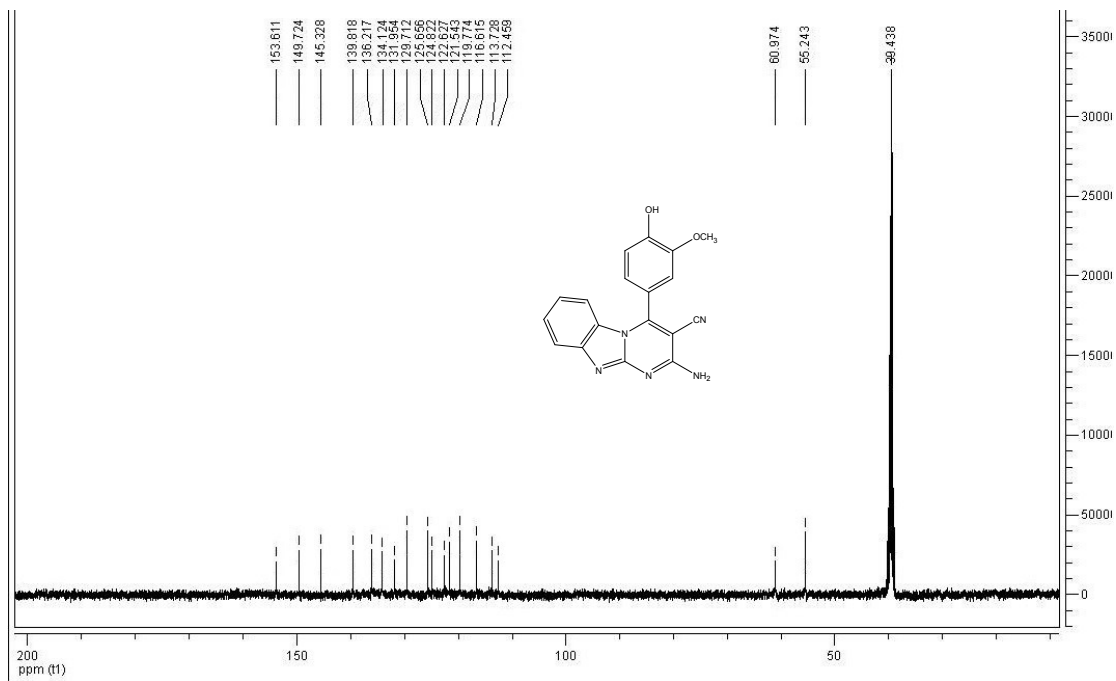

Fig s50 <sup>13</sup>C-NMR spectrum of 8d
